# Supplementary material for: Long-range hydrogen-bond relay catalyses the excited-state proton transfer reaction
Source: Royal Society of Chemistry journal article supplement (doi:10.1039/d3sc01441j), 2023-01-01
Supplement: d3sc01441j2.pdf [file d3sc01441j2.pdf]

## Supporting Information

### Long-range hydrogen-bond relay catalysing excited-state proton transfer reaction

Kai-Hsin Chang,<sup>†, a</sup> Yu-Chiang Peng,<sup>†, a</sup> Kuan-Hsuan Su,<sup>†, b</sup> Yi-Hsien Lin,<sup>b</sup> Jiun-Chi Liu,<sup>a</sup> Ying-Hsuan Liu,<sup>a</sup> Chao-Hsien Hsu,<sup>a</sup> Hsiao-Ching Yang<sup>b,\*</sup> and Pi-Tai Chou<sup>a,\*</sup>

<sup>†</sup> These authors contributed equally

#### Contents

|                                                                      |     |
|----------------------------------------------------------------------|-----|
| 1. Synthesis method, NMR, MASS, mid-IR, and X-ray of Materials ..... | S2  |
| 2. Photophysical measurements .....                                  | S22 |
| 3. pH titration .....                                                | S28 |
| 4. Theoretical computation (1) – Gaussian program .....              | S29 |
| 5. Theoretical computation (2) - MD.....                             | S33 |
| 6. Reference .....                                                   | S36 |

## 1. Synthesis method, NMR, MASS, mid-IR, and X-ray of Materials

**7-nitro-1,2,3,4-tetrahydroquinoline (compound 2)** and **7-amino-1,2,3,4-tetrahydroquinoline (compound 3)** are reported in Reference section.<sup>S1,S2</sup>

**Ethyl-7-((ethoxycarbonyl)amino)-3,4-dihydroquinoline-1(2H)-carboxylate (compound 4):** In a 100mL two-neck round-bottom flask, compound **3** (4.23 g, 28.54 mmol) was dissolved in CH<sub>2</sub>Cl<sub>2</sub> (45.0 mL). Subsequently, pyridine (5.75 mL, 71.36 mmol) was added to the solution and the mixture was stirred at 0°C. After stirring for 30 minutes, ethyl chloroformate (5.98 mL, 62.79 mmol) was added dropwise in the mixture, stirred at room temperature for 12 hours. The result was wash with 10% HCl<sub>(aq)</sub> two times (30 mL x 2) and H<sub>2</sub>O three times. The organic layer was dried with MgSO<sub>4</sub>, concentrated under reduced pressure to give the compound **4** as brown oil without any purification. Yield: 93%. <sup>1</sup>H NMR (400 MHz, CDCl<sub>3</sub>): δ = 7.69 (s, 1 H), 7.15 (s, 1 H), 6.99 (d, *J* = 8.0, 2.5 Hz, 1 H), 6.48 (s, 1 H), 4.23 (dq, *J* = 11.8, 7.1 Hz, 4 H), 3.78 – 3.64 (m, 2 H), 2.68 (t, *J* = 6.5 Hz, 2 H), 1.89 (dt, *J* = 12.7, 6.4 Hz, 2 H), 1.30 (tt, *J* = 22.5, 11.3 Hz, 6 H) ppm.

**Ethyl-6-bromo-7-((ethoxycarbonyl)amino)-3,4-dihydroquinoline-1(2H)-carboxylate (compound 5):** The compound **4** (6.74 g, 23.06 mmol) was dissolved in THF under nitrogen and stirred at 0°C. Then the solution of N-bromosuccinimide (NBS, 4.92 g, 27.67 mmol) in THF was added into the reaction, stirred at room temperature for 12 hours. The result was concentrated under reduced pressure. The crude product was washed with H<sub>2</sub>O (20 mL x 3) three times. The organic layer was dried with MgSO<sub>4</sub>, concentrated under reduced pressure to give compound **5** as yellow solid without any purification. Yield: 78%. <sup>1</sup>H NMR (400 MHz, Acetone): δ = 8.37 (s, 1 H), 7.59 (s, 1 H), 7.31 (s, 1 H), 4.23 (dq, *J* = 11.8, 7.1 Hz, 4 H), 3.78 – 3.64 (m, 2 H), 2.68 (t, *J* = 6.5 Hz, 2 H), 1.89 (dt, *J* = 12.7, 6.4 Hz, 2 H), 1.30 (tt, *J* = 22.5, 11.3 Hz, 6 H) ppm. <sup>13</sup>C NMR (100 MHz, CD<sub>3</sub>OD) δ = 154.88 (s), 154.31 (s), 139.2 (s), 134.69 (s), 132.39 (s), 128.32 (s), 119.38 (s), 109.48 (s), 62.39 (s), 61.63 (s), 45.37 (s), 27.28 (s), 23.63 (s), 14.80 (s), 14.71 (s) ppm.

**Ethyl-7-((ethoxycarbonyl)amino)-6-((trimethylsilyl)ethynyl)-3,4-dihydroquinoline-1(2H)-carboxylate (compound 6):** In a two-neck round round-bottom flask, the mixture of compound **5** (6.32 g, 17.02 mmol), copper(I) iodide (3.24 g, 17.02 mmol) and bis(triphenylphosphine)palladium(II) dichloride (5.97 g, 8.51 mmol) was dissolved in 40mL Et<sub>3</sub>N / Toluene (3:1). The ethynyltrimethylsilane (3.63 mL, 25.53 mmol) was added to the mixture, stirred at 90°C for 18 hours. The result was filtered through celite and then concentrated under reduced pressure. The crude was purified by silica column chromatography (EA/Hex 1:10) to afford the compound **6** as yellow oil with yield of 68%. <sup>1</sup>H NMR (400 MHz, CDCl<sub>3</sub>): δ = 8.54 (s, 1 H), 7.25 (s, 1 H), 7.09 (s, 1 H), 4.23 (dq, *J* = 14.0, 7.1 Hz, 4 H), 3.75 – 3.69 (m, 2 H), 2.64 (t, *J* = 6.5 Hz, 2 H), 1.91 – 1.82 (m, 2 H), 1.30 (q, *J* = 7.4 Hz, 6 H), 0.25 (s, 9 H) ppm.

**Ethyl-6,7-dihydro-1H-pyrrolo[3,2-*g*]quinoline-8(5H)-carboxylate (compound 7):** The 60mL ethanol (99.5%, extra dry) was stirred in the two-neck round-bottom flask under nitrogen. Subsequently, the sodium metal (2.66 g, 115.7 mmol) was added into the solution at room temperature, stirred until all of sodium metal was dissolved. The compound **6** (4.30 g, 11.57 mmol) in the ethanol (99.5%, extra dry) was added into the reaction and then stirred at 80°C for 10 hours. The crude product was concentrated under reduced pressure and purified by silica column chromatography (EA/Hex 1:6) to afford the

compound **7** as yellow solid with yield of 49%.  $^1\text{H}$  NMR (400 MHz,  $\text{CDCl}_3$ ):  $\delta$  = 8.04 (s, 1 H), 7.72 (s, 1 H), 7.31 (s, 1 H), 7.18 – 7.04 (m, 1 H), 6.41 (s, 1 H), 4.24 (q,  $J$  = 7.1 Hz, 2 H), 3.76 (t,  $J$  = 6.5 Hz, 2 H), 2.81 (t,  $J$  = 6.5 Hz, 2 H), 2.01 – 1.86 (m, 2 H), 1.31 (t,  $J$  = 7.1 Hz, 3 H) ppm.  $^{13}\text{C}$  NMR (100 MHz,  $\text{CDCl}_3$ ):  $\delta$  = 15.4 (s), 24.2 (s), 25.5 (s), 43.1 (s), 46.1 (s), 102.7 (s), 103.5 (s), 103.7 (s), 119.2 (s), 121.3 (s), 123.2 (s), 125.3 (s), 128.1 (s), 130.4 (s) ppm.

**5,6,7,8-tetrahydro-1H-pyrrolo[3,2-g]quinoline (compound 8)**: The compound **7** (1.2 g, 4.91 mmol) was dissolved in 40 mL ethanol, stirred at room temperature. The 10M  $\text{NaOH}_{(\text{aq})}$  (10 mL) was added dropwise in the reaction and then the mixture was stirred at  $90^\circ\text{C}$  for 3 hours. The crude product was concentrated under reduced pressure and purified by silica column chromatography (EA/Hex 1:3) to afford the compound **8** as dark yellow solid with yield of 48%. Compound **8** is not stable, which must do the next step, immediately.  $^1\text{H}$  NMR (400 MHz,  $\text{CDCl}_3$ ):  $\delta$  = 7.69 (s, 1 H), 7.18 (s, 1 H), 6.92 (dd,  $J$  = 3.2, 2.3 Hz, 1 H), 6.45 (s, 1 H), 6.32 (ddd,  $J$  = 3.1, 2.0, 0.9 Hz, 1 H), 6.10 (s, 1 H), 3.35 – 3.25 (m, 2 H), 2.88 (t,  $J$  = 6.4 Hz, 2 H), 1.95 (m, Hz, 2 H) ppm.  $^{13}\text{C}$  NMR (100 MHz,  $\text{CDCl}_3$ ):  $\delta$  = 23.14 (s), 28.75 (s), 40.34 (s), 94.70 (s), 104.70 (s), 117.07 (s), 118.26 (s), 120.05 (s), 124.83 (s), 136.34 (s), 137.30 (s) ppm.

**1H-pyrrolo[3,2-g]quinoline (PyrQ)**: The *o*-xylene was added into the mixture of compound **8** (832.1 mg, 4.83 mmol) and activated carbon (832.1 mg), stirred under oxygen. After stirring for 10 minutes, the reaction was heated to  $120^\circ\text{C}$  and stirred for 24 hours. The crude product was filtered through celite and then concentrated under reduced pressure. The crude product was purified by silica column chromatography (EA/Hex 1:2) to obtain **PyrQ** as yellow solid. Yield: 26%. m.p.  $167.0\text{--}167.5^\circ\text{C}$  (decomp.)  $^1\text{H}$  NMR (500 MHz, Acetone)  $\delta$  10.48 (s, 1H), 8.76 (dd,  $J$  = 4.0, 1.7 Hz, 1H), 8.35 – 8.30 (m, 1H), 8.13 (s, 1H), 8.08 (s, 1H), 7.68 (dd,  $J$  = 3.2, 2.3 Hz, 1H), 7.27 (dd,  $J$  = 8.4, 4.0 Hz, 1H), 6.72 – 6.66 (m, 1H);  $^{13}\text{C}$  NMR (500 MHz, Acetone):  $\delta$  = 149.32 (s), 145.62 (s), 140.03 (s), 136.68 (s), 131.19 (s), 131.13 (s), 123.77 (s), 118.56 (s), 118.03 (s), 108.67 (s), 101.35 (s) ppm; HRMS (ESI):  $m/z$  calcd for  $\text{C}_{11}\text{H}_8\text{N}_2$  [ $\text{M}^+$ ]: 168.0687; Found: 168.0686.

**Ethyl 3-cyano-6,7-dihydro-1H-pyrrolo[3,2-g]quinoline-8(5H)-carboxylate (compound 9)**: Compound **7** (1.4 g, 5.37 mmol) was dissolved in DMF (8 mL) and then added to a flask containing  $\text{POCl}_3$  (0.53 mL) and DMF (2 mL) which had been stirred for 30 minutes at  $0^\circ\text{C}$ . After stirring at  $40^\circ\text{C}$  for 3 hours,  $\text{I}_2$  (3.64 g, 28.65 mmol) and  $\text{NH}_3_{(\text{aq})}$  (10 mL) were added to the reaction mixture. The obtained mixture was stirred for 3 hours at room temperature. After the reaction, the mixture was poured into saturated  $\text{Na}_2\text{SO}_3$  solution and extracted with  $\text{CHCl}_3$  (15 mL x 4). The organic layer was dried over  $\text{Na}_2\text{SO}_4$ , filtered, and purified by silica column chromatography (EA/Hex 1:4) to provide compound **9** in 68% yield.  $^1\text{H}$  NMR (400 MHz,  $\text{CDCl}_3$ )  $\delta$  8.30 (s, 1H), 7.71 (s, 1H), 7.14 (s, 1H), 4.24 (q,  $J$  = 7.1 Hz, 1H), 3.88 – 3.51 (m, 1H), 2.95 – 2.73 (m, 1H), 2.01 – 1.87 (m, 1H), 1.31 (t,  $J$  = 7.1 Hz, 1H).  $^{13}\text{C}$  NMR (100 MHz, DMSO):  $\delta$  = 13.29 (s), 21.71 (s), 30.99 (s), 43.12 (s), 47.36 (s), 101.24 (s), 102.35 (s), 104.04 (s), 119.84 (s), 122.11 (s), 123.22 (s), 124.38 (s), 128.88 (s), 133.43 (s), 152.61 (s) ppm.

**5,6,7,8-tetrahydro-1H-pyrrolo[3,2-g]quinoline-3-carbonitrile (compound 10)**: The compound **9** (1 g, 3.71 mmol) was dissolved in 40 mL ethanol, stirred at room temperature. The 10M  $\text{NaOH}_{(\text{aq})}$  (10 mL) was added dropwise in the reaction and then the mixture was stirred at  $90^\circ\text{C}$  for 3 hours. The resulted solution was concentrated under reduced pressure and purified by silica column chromatography (EA/Hex 1:4) to afford compound **10** as white solid with yield of 49%. Compound **10** is not stable, which

must proceed with the next-step synthesis immediately.

**1H-pyrrolo[3,2-*g*]quinoline-3-carbaldehyde (PyrQ-al):** PyrQ (65.1 mg, 0.39 mmol) was dissolved in DMF (2 mL) and then added to a flask containing POCl<sub>3</sub> (0.039 mL) and DMF (3 mL) which was stirred for 30 minutes at 0°C. After stirring at 40°C for 3 hours, the reaction mixture was treated with iced water, followed by removing DMF under reduced pressure. The crude product was purified by silica column chromatography (EA/Hex 1:1) to obtain **PyrQ-al** as yellow solid. Yield: 68%. <sup>1</sup>H NMR (400 MHz, CDCl<sub>3</sub>) δ = 11.42 (s, 1 H), 9.97 (s, 1 H), 8.23 (q, 1 H), 8.00 (s, 1 H), 7.89 (s, 1 H), 7.75 (d, 1 H), 7.49 (s, 1 H), 7.03 (s, 1 H) ppm. <sup>13</sup>C NMR (100 MHz, CDCl<sub>3</sub>): δ = 186.1 (s), 159.1 (s), 156.4 (s), 150.6 (s), 145.0 (s), 143.5 (s), 140.6 (s), 135.5 (s), 133.8 (s), 128.3 (s), 124.1 (s), 117.52 (s) ppm. HRMS (ESI): *m/z* calcd for C<sub>12</sub>H<sub>8</sub>N<sub>2</sub>O [M<sup>+</sup>]: 196.0637; Found: 196.0634.

**1H-pyrrolo[3,2-*g*]quinoline-3-carbonitrile (PyrQ-CN):** The *o*-xylene was added into the mixture of compound **10** (340.1 mg, 1.72 mmol) and activated carbon (340.1 mg), stirred under oxygen. After stirring for 10 minutes, the reaction was heated to 120°C and stirred for 24 hours. The resulted solution was filtered through celite and then concentrated under reduced pressure. The crude product was purified by silica column chromatography (EA/Hex 1:1) to obtain **PyrQ-CN** as yellow solid. Yield: 29%. <sup>1</sup>H NMR (400 MHz, CDCl<sub>3</sub>): δ = 11.62 (s, 1 H), 8.77 (q, 1 H), 8.49 (d, 1 H), 8.23 (s, 1 H), 7.94 (s, 1 H), 7.77 (dd, *J* = 8.4, 4.0 Hz, 1 H), 7.58 (d, 1 H) ppm. <sup>13</sup>C NMR (100 MHz, CDCl<sub>3</sub>): δ = 186.1 (s), 159.1 (s), 156.4 (s), 150.6 (s), 145.0 (s), 143.5 (s), 140.6 (s), 135.5 (s), 133.8 (s), 128.3 (s), 124.1 (s), 117.52 (s) ppm. HRMS (ESI): *m/z* calcd for C<sub>12</sub>H<sub>7</sub>N<sub>3</sub> [M<sup>+</sup>]: 193.0640; Found: 193.0641.

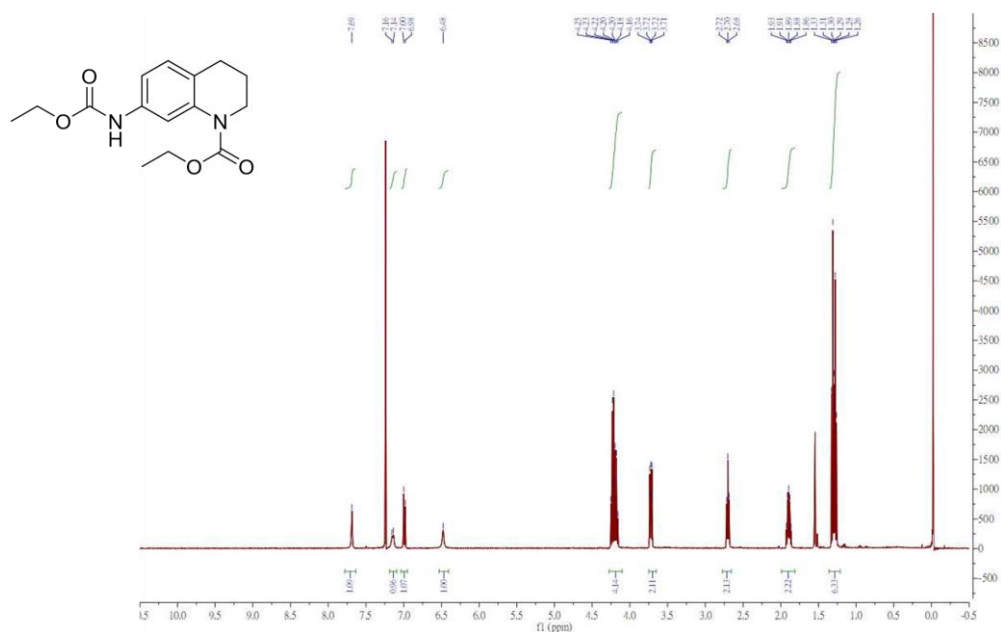

**Figure S1.** The  $^1\text{H}$ -NMR spectrum of **Ethyl-7-((ethoxycarbonyl)amino)-3,4-dihydroquinoline-1(2H)-carboxylate (compound 4)**.

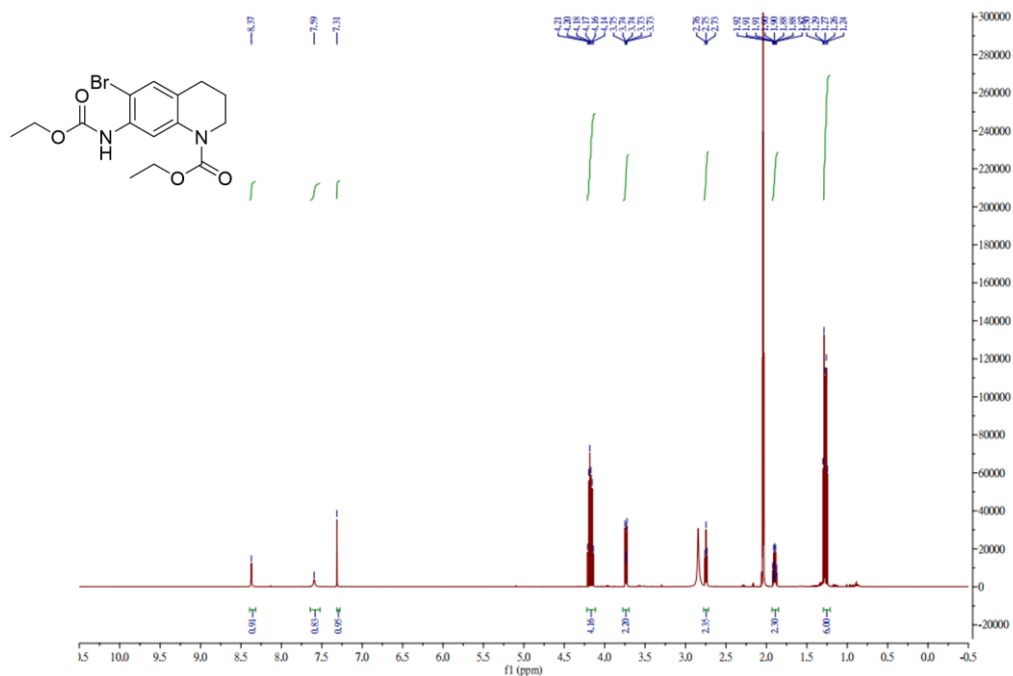

**Figure S2.** The  $^1\text{H}$ -NMR spectrum of **Ethyl-6-bromo-7-((ethoxycarbonyl)amino)-3,4-dihydroquinoline-1(2H)-carboxylate (compound 5)**.

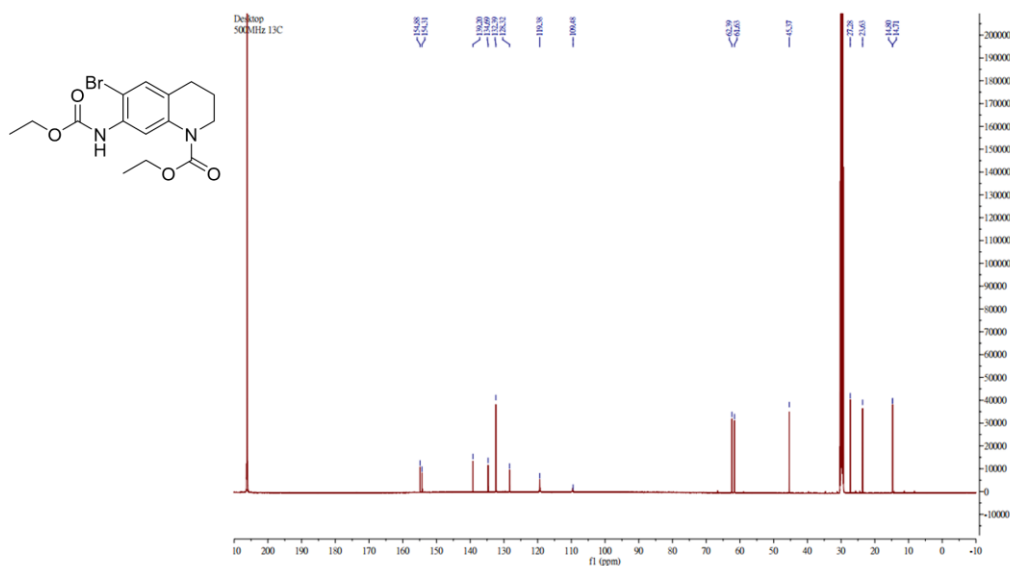

**Figure S3.** The  $^{13}\text{C}$ -NMR spectrum of **Ethyl-6-bromo-7-((ethoxycarbonyl)amino)-3,4-dihydroquinoline-1(2H)-carboxylate (compound 5)**.

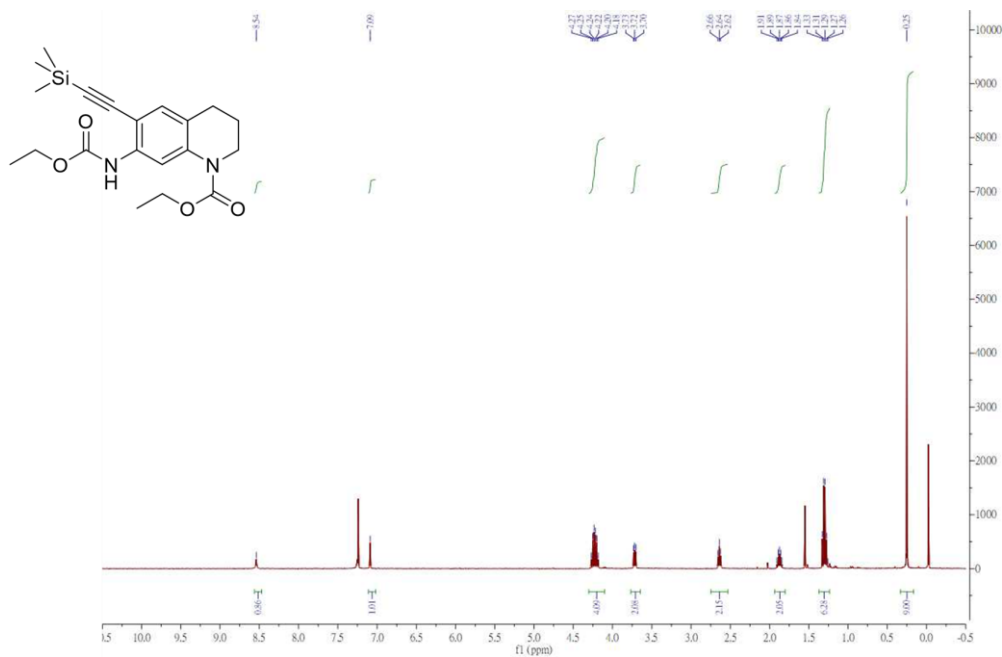

**Figure S4.** The  $^1\text{H}$ -NMR spectrum of **Ethyl-7-((ethoxycarbonyl)amino)-6-((trimethylsilyl)ethynyl)-3,4-dihydroquinoline-1(2H)-carboxylate (compound 6)**.

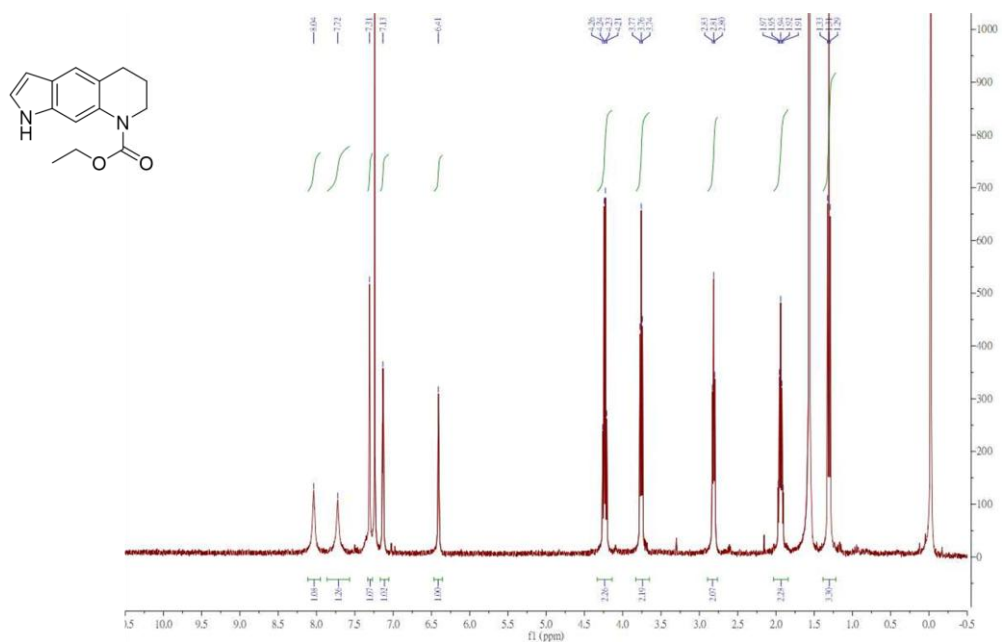

**Figure S5.** The <sup>1</sup>H-NMR spectrum of Ethyl-6,7-dihydro-1H-pyrrolo[3,2-g]quinoline-8(5H)-carboxylate (compound 7).

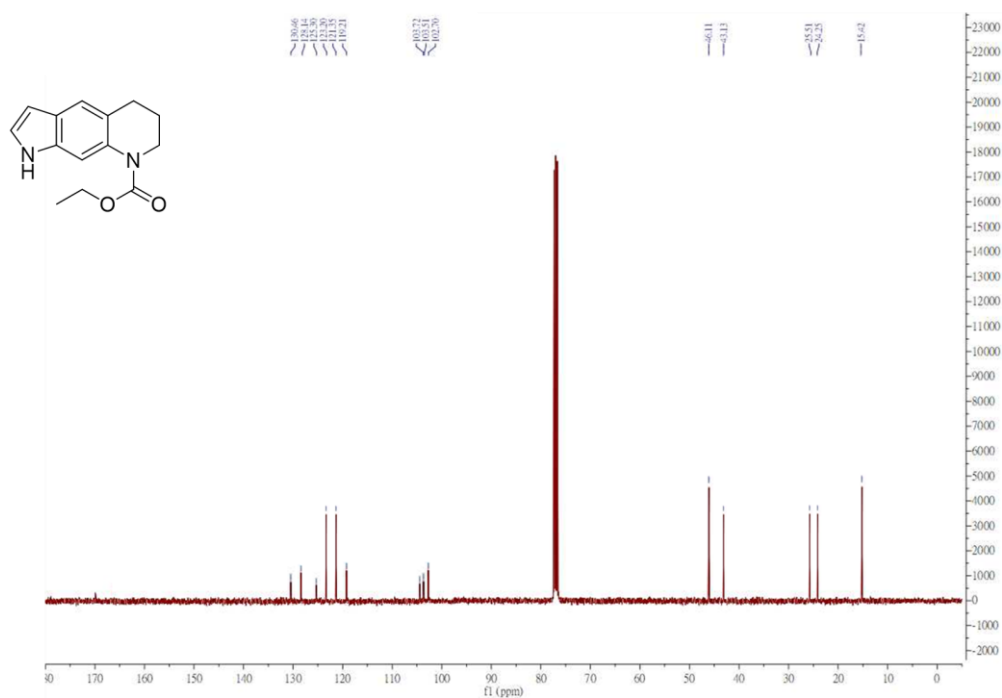

**Figure S6.** The <sup>13</sup>C-NMR spectrum of Ethyl-6,7-dihydro-1H-pyrrolo[3,2-g]quinoline-8(5H)-carboxylate (compound 7).

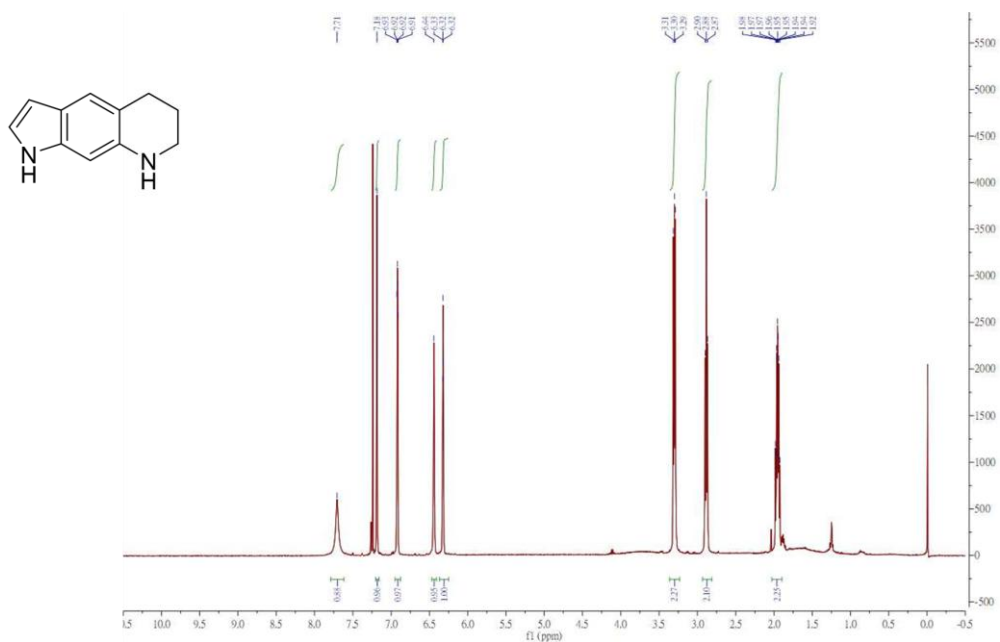

**Figure S7.** The <sup>1</sup>H-NMR spectrum of 5,6,7,8-tetrahydro-1H-pyrrolo[3,2-g]quinoline (compound 8).

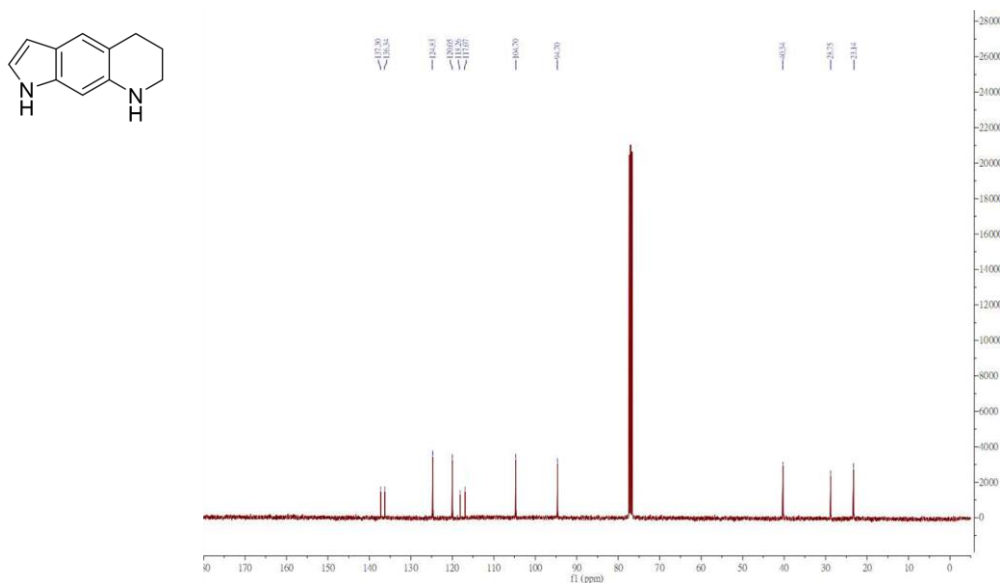

**Figure S8.** The <sup>13</sup>C-NMR spectrum of 5,6,7,8-tetrahydro-1H-pyrrolo[3,2-g]quinoline (compound 8).

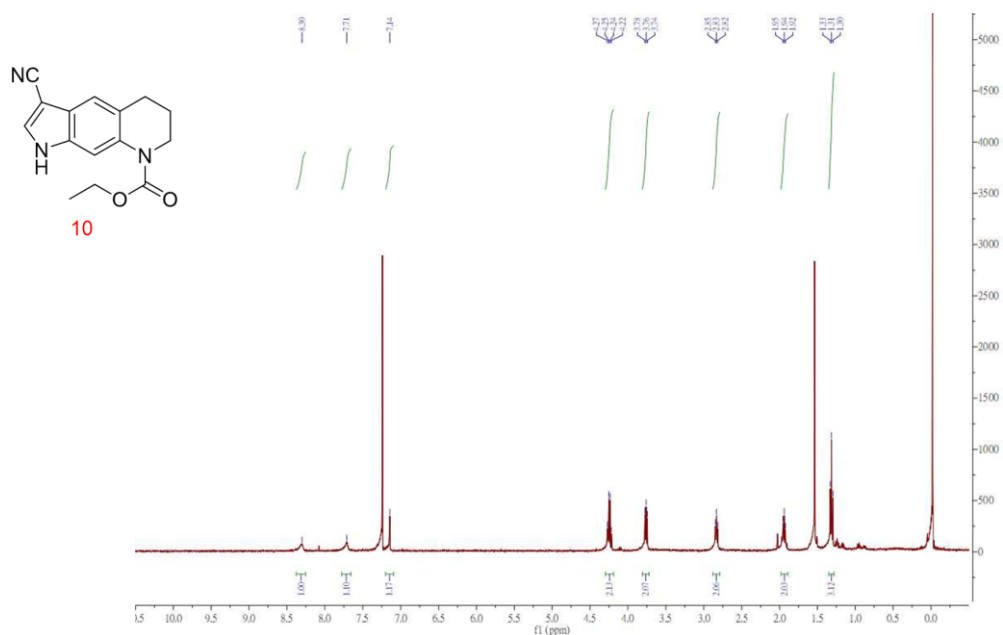

**Figure S9.** The  $^1\text{H}$ -NMR spectrum of **Ethyl 3-cyano-6,7-dihydro-1H-pyrrolo[3,2-g]quinoline-8(5H)-carboxylate (compound 9)**.

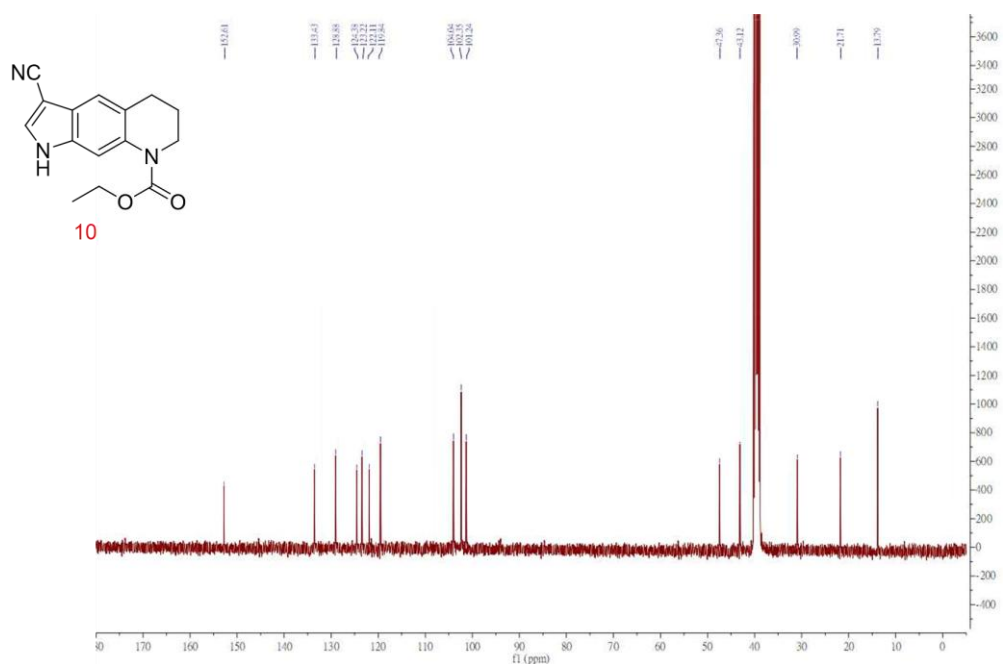

**Figure S10.** The  $^{13}\text{C}$ -NMR spectrum of **Ethyl 3-cyano-6,7-dihydro-1H-pyrrolo[3,2-g]quinoline-8(5H)-carboxylate (compound 9)**.

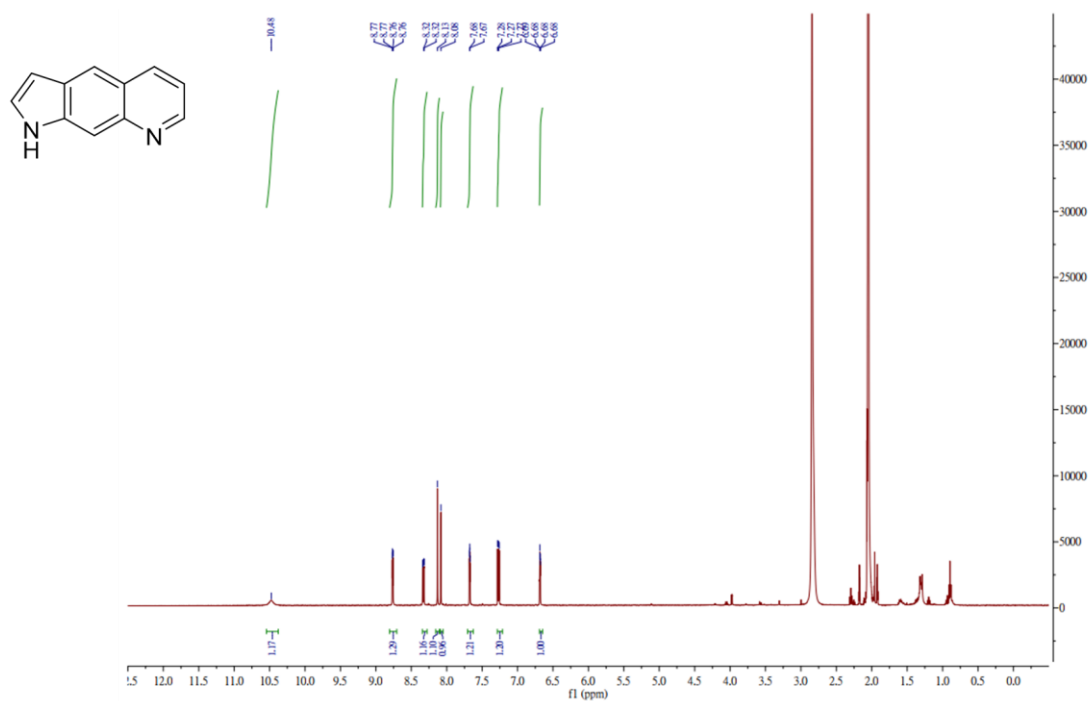

**Figure S11.** The <sup>1</sup>H-NMR spectrum of 1H-pyrrolo[3,2-g]quinoline (PyrQ).

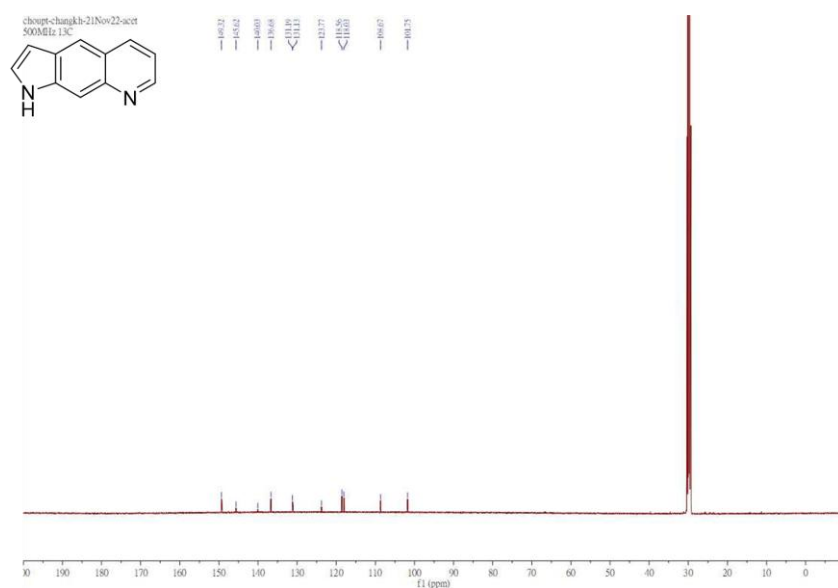

**Figure S12.** The <sup>13</sup>C-NMR spectrum of 1H-pyrrolo[3,2-g]quinoline (PyrQ).

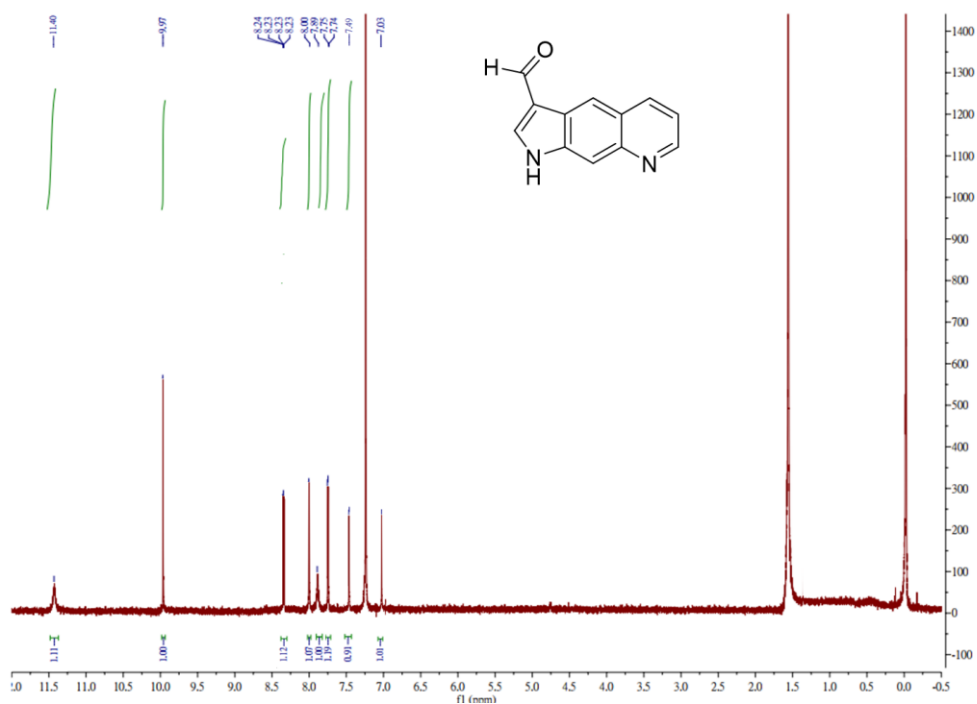

Figure S13. The  $^1\text{H}$ -NMR spectrum of 1H-pyrrolo[3,2-g]quinoline-3-carbaldehyde (PyrQ-al).

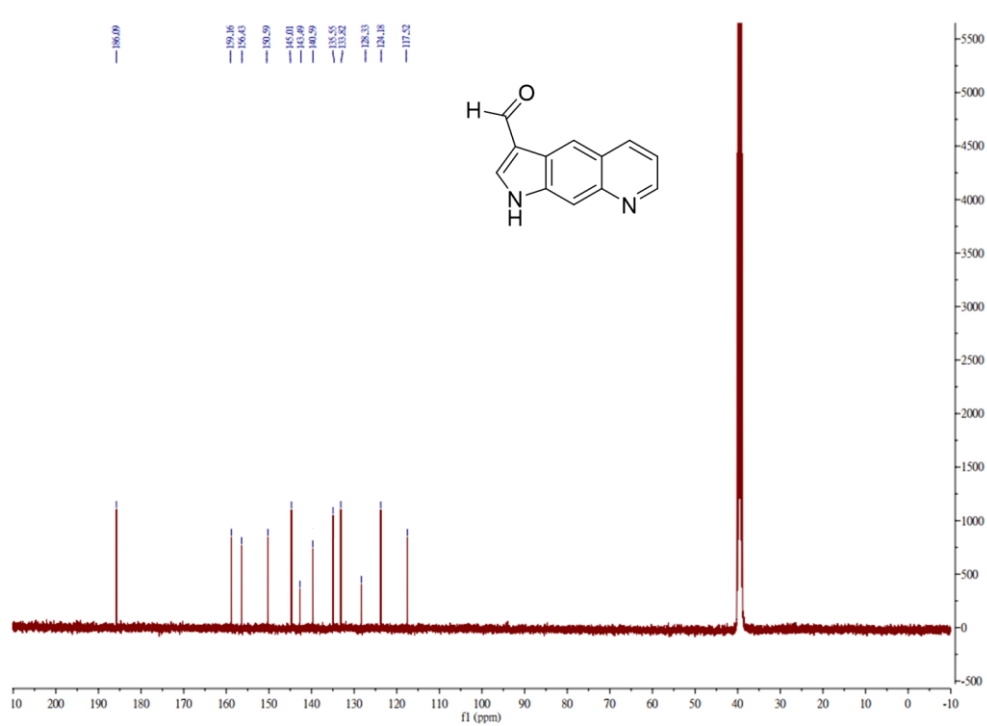

Figure S14. The  $^{13}\text{C}$ -NMR spectrum of 1H-pyrrolo[3,2-g]quinoline-3-carbaldehyde (PyrQ-al).

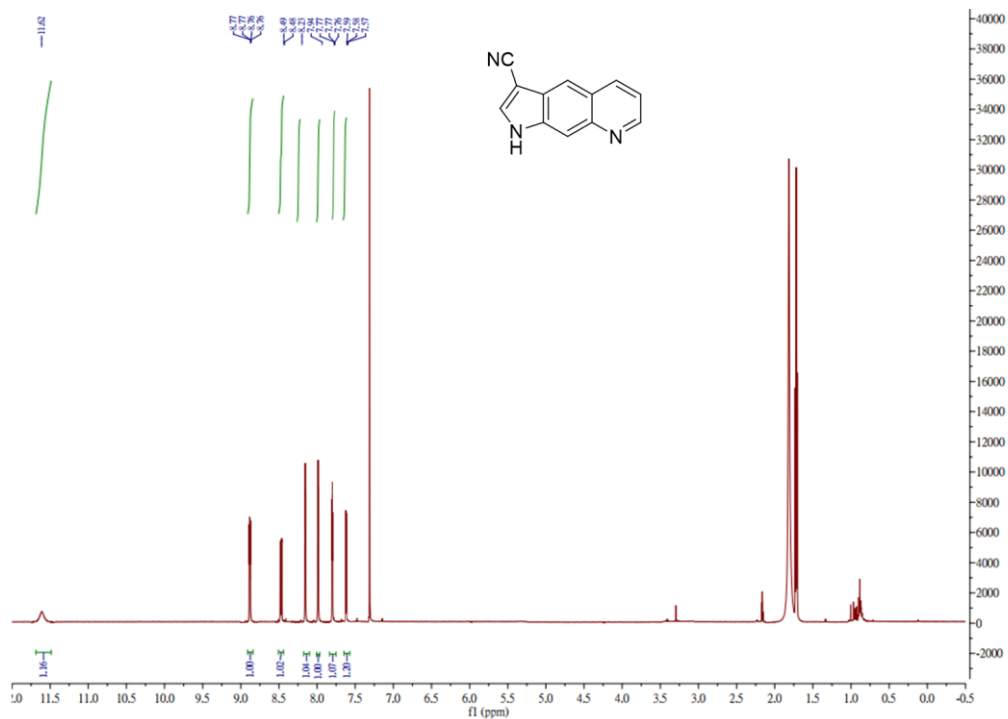

Figure S15. The <sup>1</sup>H-NMR spectrum of 1H-pyrrolo[3,2-g]quinoline-3-carbonitrile (PyrQ-CN).

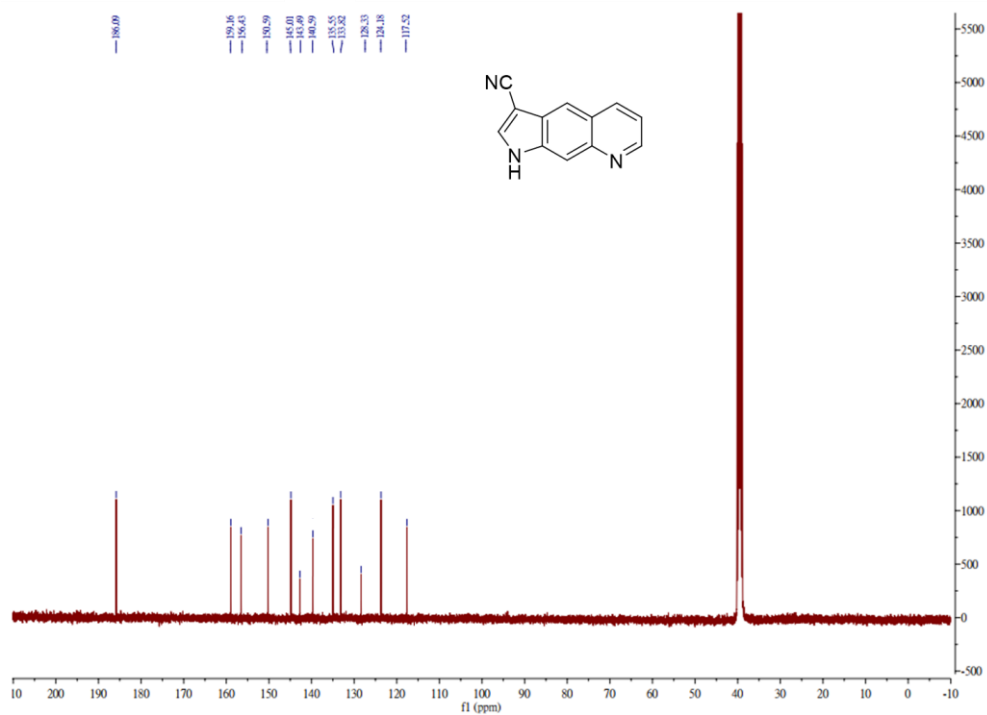

Figure S16. The <sup>13</sup>C-NMR spectrum of 1H-pyrrolo[3,2-g]quinoline-3-carbonitrile (PyrQ-CN).

[ Mass Spectrum ]  
 Data : 20211110EI\_002\_PyrQ Date : 10-Nov-2021 10:44  
 RT : 1.03 min Scan# : (10,11)  
 Elements : C 50/0, H 49/0, N 2/0  
 Mass Tolerance : 100ppm, 5mmu if m/z < 50, 50mmu if m/z > 500  
 Unsaturation (U.S.) : -0.5 - 100.0

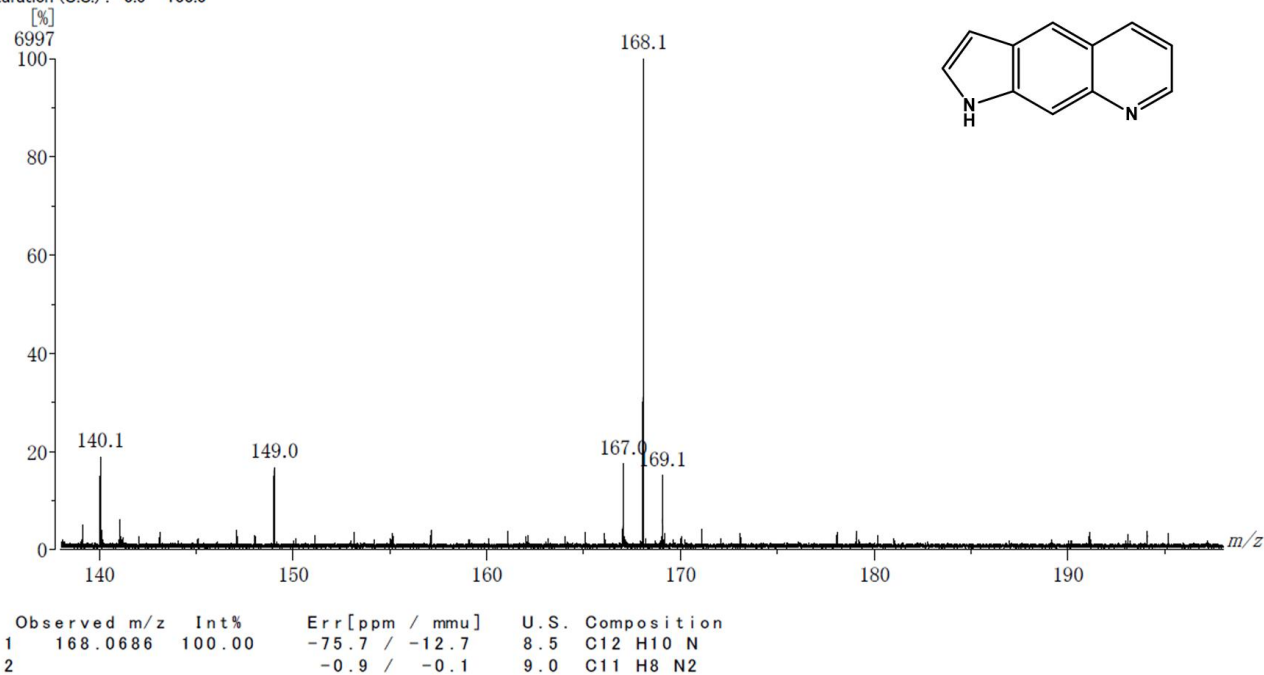

**Figure S17.** The MS spectrum of 1H-pyrrolo[3,2-g]quinoline (**PyrQ**), which measured by Electrospray Ionization (ESI).

[ Mass Spectrum ]  
 Data : 20211207EI\_002\_PyrQ-al Date : 07-Dec-2021 09:48  
 RT : 3.47 min Scan# : (32,33)  
 Elements : C 50/0, H 49/0, N 2/0, O 1/0  
 Mass Tolerance : 100ppm, 5mmu if m/z < 50, 50mmu if m/z > 500  
 Unsaturation (U.S.) : -0.5 - 100.0

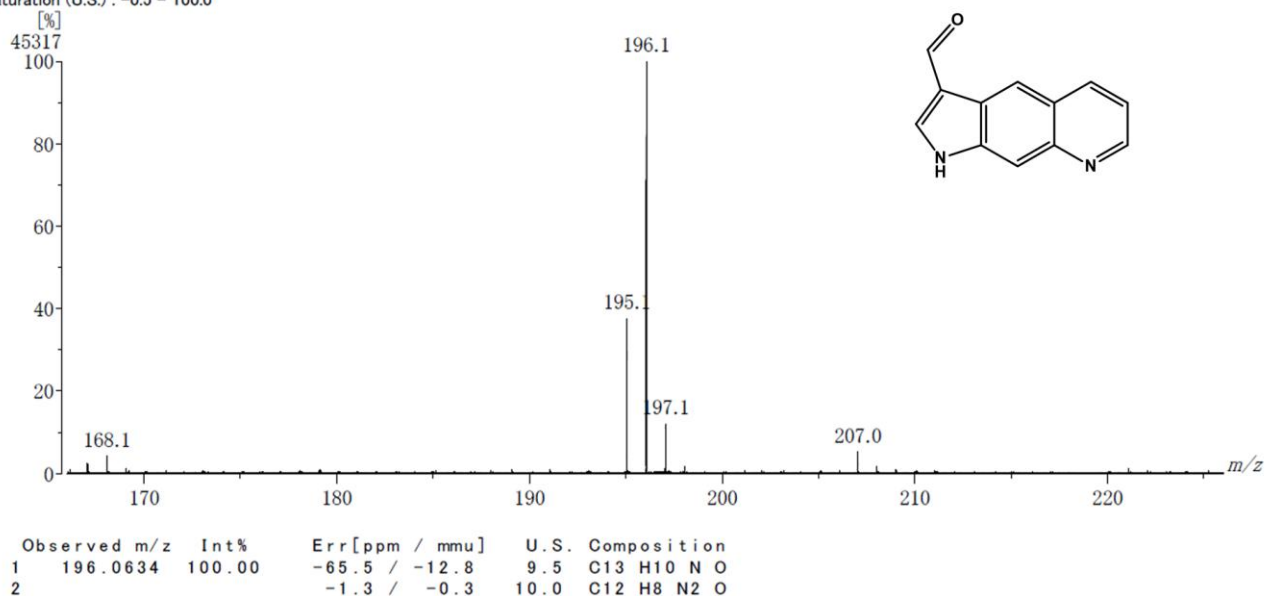

**Figure S18.** The MS spectrum of 1H-pyrrolo[3,2-g]quinoline-3-carbaldehyde (**PyrQ-al**), which measured by Electrospray Ionization (ESI).

[ Mass Spectrum ]  
 Data : 20220110EI.002\_PyrQ-CN      Date : 10-Jan-2022 15:56  
 RT : 1.59 min      Scan# : 15  
 Elements : C 50/0, H 49/0, N 3/0  
 Mass Tolerance : 100ppm, 5mmu if m/z < 50, 50mmu if m/z > 500  
 Unsaturation (U.S.) : -0.5 - 100.0

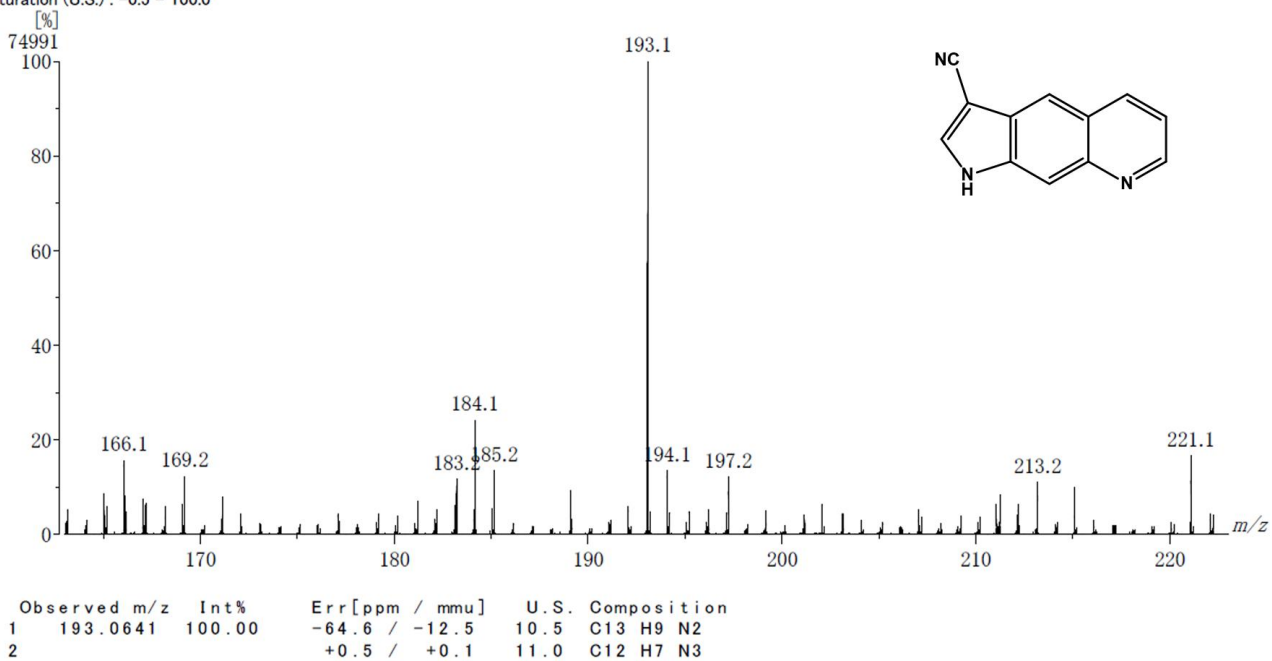

**Figure S19.** The MS spectrum of 1H-pyrrolo[3,2-g]quinoline-3-carbonitrile (**PyrQ-CN**), which measured by Electrospray Ionization (ESI).

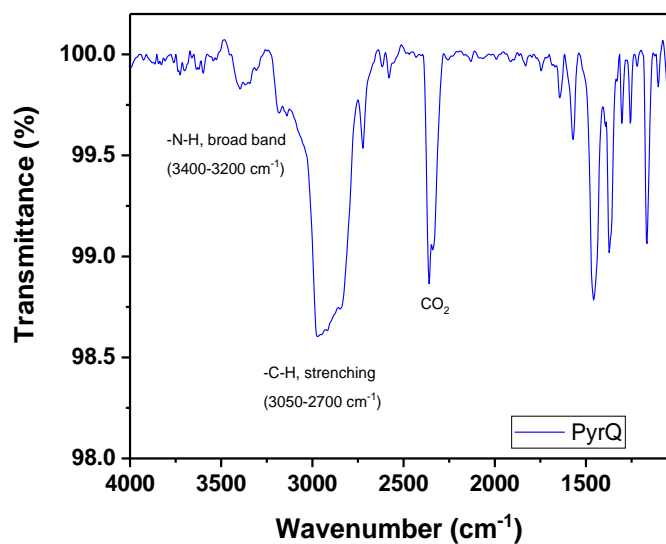

**Figure S20.** The mid-IR spectrum of 1*H*-pyrrolo[3,2-*g*]quinoline (**PyrQ**). The -NH absorption peak is found around 3400-3200 cm<sup>-1</sup>.

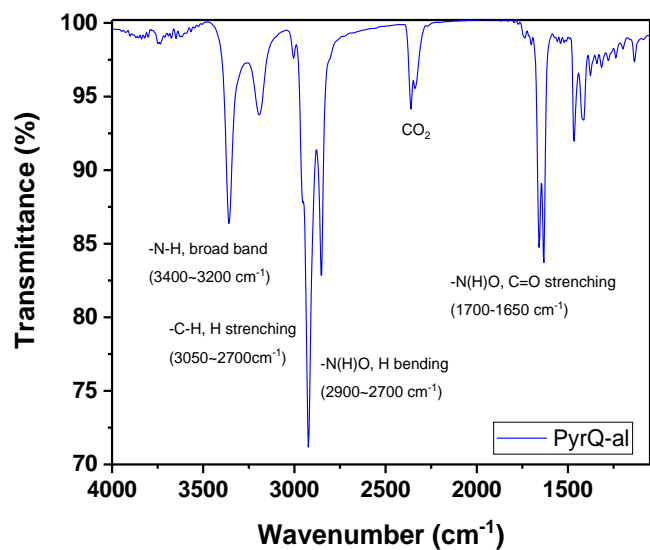

**Figure S21.** The mid-IR spectrum of 1*H*-pyrrolo[3,2-*g*]quinoline-3-carbaldehyde (**PyrQ-al**). The -NH absorption peak is found around 3400-3200 cm<sup>-1</sup>. There is an obvious carbonyl group (C=O) characteristic peak at 1700-1650 cm<sup>-1</sup> and C-H of the aldehyde absorption peak at 2900-2700 cm<sup>-1</sup>.

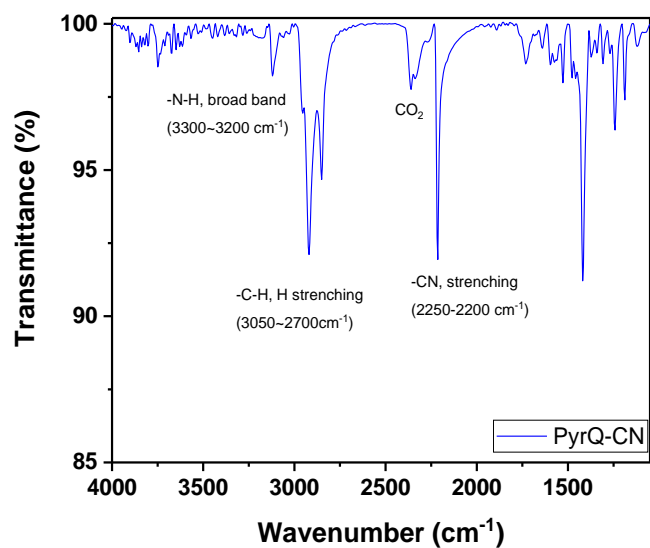

**Figure S22.** The mid-IR spectrum of 1*H*-pyrrolo[3,2-*g*]quinoline-3-carbonitrile (**PyrQ-CN**). The -NH absorption peak is found around 3300-3200 cm<sup>-1</sup>. Also, **PyrQ-CN** has a significant nitrile group (-CN) stretch peak at 2250-2200 cm<sup>-1</sup>.

**Table 1.** Crystal data and structure refinement for ic20904.

|                                   |                                               |          |
|-----------------------------------|-----------------------------------------------|----------|
| Identification code               | ic20904                                       |          |
| Empirical formula                 | C11 H8 N2                                     |          |
| Formula weight                    | 168.19                                        |          |
| Temperature                       | 200(2) K                                      |          |
| Wavelength                        | 0.71073 Å                                     |          |
| Crystal system                    | Orthorhombic                                  |          |
| Space group                       | P2 <sub>1</sub> 2 <sub>1</sub> 2 <sub>1</sub> |          |
| Unit cell dimensions              | a = 5.7781(2) Å                               | α = 90°. |
|                                   | b = 10.1450(4) Å                              | β = 90°. |
|                                   | c = 14.0978(4) Å                              | γ = 90°. |
| Volume                            | 826.40(5) Å <sup>3</sup>                      |          |
| Z                                 | 4                                             |          |
| Density (calculated)              | 1.352 Mg/m <sup>3</sup>                       |          |
| Absorption coefficient            | 0.083 mm <sup>-1</sup>                        |          |
| F(000)                            | 352                                           |          |
| Crystal size                      | 0.185 x 0.166 x 0.079 mm <sup>3</sup>         |          |
| Theta range for data collection   | 2.473 to 30.000°.                             |          |
| Index ranges                      | -8 ≤ h ≤ 7, -14 ≤ k ≤ 14, -19 ≤ l ≤ 19        |          |
| Reflections collected             | 15065                                         |          |
| Independent reflections           | 2423 [R(int) = 0.0401]                        |          |
| Completeness to theta = 25.242°   | 100.0 %                                       |          |
| Absorption correction             | Semi-empirical from equivalents               |          |
| Max. and min. transmission        | 0.9602 and 0.8198                             |          |
| Refinement method                 | Full-matrix least-squares on F <sup>2</sup>   |          |
| Data / restraints / parameters    | 2423 / 0 / 122                                |          |
| Goodness-of-fit on F <sup>2</sup> | 1.070                                         |          |
| Final R indices [I > 2σ(I)]       | R1 = 0.0393, wR2 = 0.1069                     |          |
| R indices (all data)              | R1 = 0.0434, wR2 = 0.1111                     |          |
| Absolute structure parameter      | -0.4(10)                                      |          |
| Extinction coefficient            | n/a                                           |          |
| Largest diff. peak and hole       | 0.212 and -0.168 e.Å <sup>-3</sup>            |          |

**Table 2.** Atomic coordinates ( $\times 10^4$ ) and equivalent isotropic displacement parameters ( $\text{\AA}^2 \times 10^3$ ) for ic20904.  $U(\text{eq})$  is defined as one third of the trace of the orthogonalized  $U^{ij}$  tensor.

|       | x       | y        | z       | U(eq) |
|-------|---------|----------|---------|-------|
| N(1)  | 2372(3) | 9447(2)  | 2934(1) | 34(1) |
| C(2)  | 4168(3) | 10271(2) | 3180(1) | 37(1) |
| C(3)  | 5779(3) | 9621(2)  | 3707(1) | 38(1) |
| C(4)  | 5861(3) | 7141(2)  | 4194(1) | 34(1) |
| C(5)  | 5472(4) | 4741(2)  | 4477(1) | 39(1) |
| C(6)  | 4239(4) | 3618(2)  | 4348(1) | 42(1) |
| C(7)  | 2125(4) | 3678(2)  | 3855(1) | 40(1) |
| N(8)  | 1232(3) | 4762(2)  | 3504(1) | 34(1) |
| C(9)  | 1559(3) | 7065(2)  | 3204(1) | 30(1) |
| C(10) | 2827(3) | 8211(2)  | 3283(1) | 30(1) |
| C(11) | 4996(3) | 8274(2)  | 3782(1) | 31(1) |
| C(12) | 4632(3) | 5948(2)  | 4112(1) | 32(1) |
| C(13) | 2451(3) | 5916(2)  | 3614(1) | 29(1) |

**Table 3.** Bond lengths [Å] and angles [°] for ic20904.

---

|                  |            |
|------------------|------------|
| N(1)-C(10)       | 1.372(2)   |
| N(1)-C(2)        | 1.377(3)   |
| C(2)-C(3)        | 1.361(3)   |
| C(3)-C(11)       | 1.444(3)   |
| C(4)-C(11)       | 1.381(3)   |
| C(4)-C(12)       | 1.409(3)   |
| C(5)-C(6)        | 1.356(3)   |
| C(5)-C(12)       | 1.415(3)   |
| C(6)-C(7)        | 1.406(3)   |
| C(7)-N(8)        | 1.312(3)   |
| N(8)-C(13)       | 1.375(2)   |
| C(9)-C(10)       | 1.379(2)   |
| C(9)-C(13)       | 1.400(2)   |
| C(10)-C(11)      | 1.439(2)   |
| C(12)-C(13)      | 1.442(2)   |
|                  |            |
| C(10)-N(1)-C(2)  | 108.62(16) |
| C(3)-C(2)-N(1)   | 111.09(18) |
| C(2)-C(3)-C(11)  | 106.47(17) |
| C(11)-C(4)-C(12) | 119.86(16) |
| C(6)-C(5)-C(12)  | 119.87(18) |
| C(5)-C(6)-C(7)   | 119.12(19) |
| N(8)-C(7)-C(6)   | 124.34(19) |
| C(7)-N(8)-C(13)  | 118.01(16) |
| C(10)-C(9)-C(13) | 118.28(15) |
| N(1)-C(10)-C(9)  | 129.78(16) |
| N(1)-C(10)-C(11) | 107.57(16) |
| C(9)-C(10)-C(11) | 122.65(16) |
| C(4)-C(11)-C(10) | 118.94(17) |
| C(4)-C(11)-C(3)  | 134.84(17) |
| C(10)-C(11)-C(3) | 106.22(17) |
| C(4)-C(12)-C(5)  | 122.75(16) |
| C(4)-C(12)-C(13) | 120.02(16) |
| C(5)-C(12)-C(13) | 117.21(17) |
| N(8)-C(13)-C(9)  | 118.28(15) |
| N(8)-C(13)-C(12) | 121.46(16) |
| C(9)-C(13)-C(12) | 120.23(16) |

---

Symmetry transformations used to generate equivalent atoms:

## 2. Photophysical measurements

### Method and measurement:

The absorption and emission spectra were recorded by Hitachi U-3310 and U-5700 spectrophotometer and Edinburgh FS980 fluorometer at National Taiwan University. The spectrum of all titled compounds was measured in methanol, cyclohexane and dichloromethane.

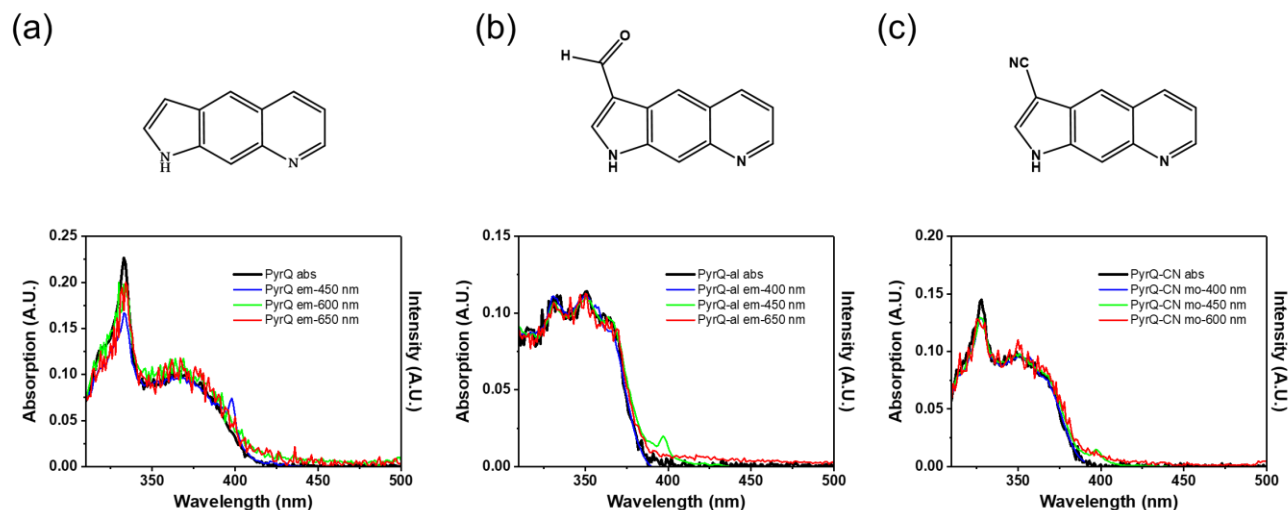

Figure S23. The excitation spectrum of (a) PyrQ, (b) PyrQ-al, and (c) PyrQ-CN in MeOH.

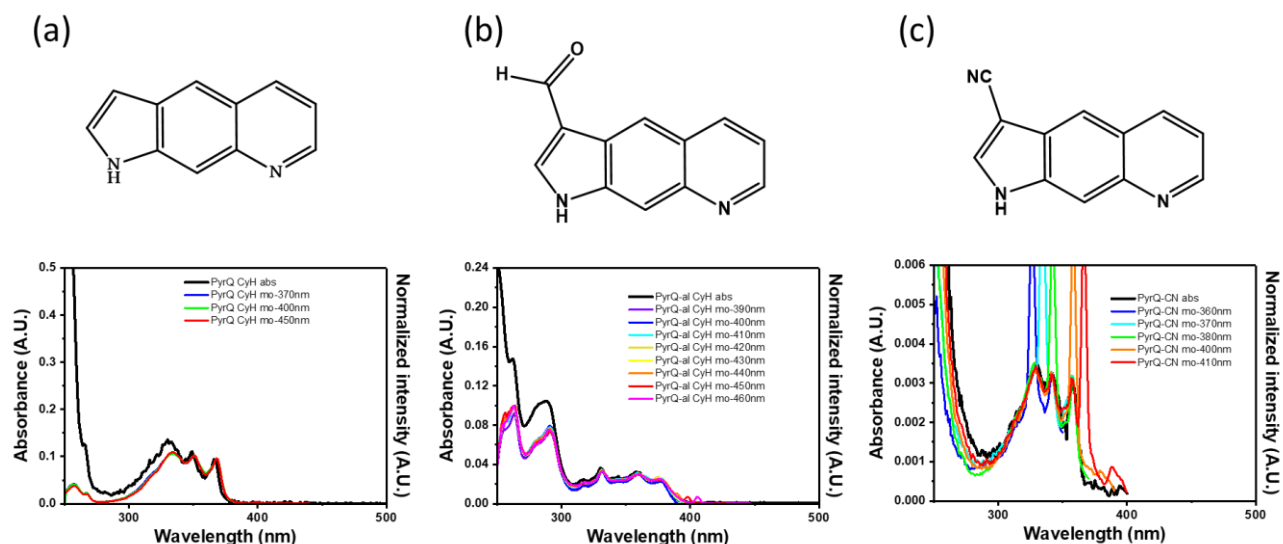

Figure S24. The excitation spectrum of (a) PyrQ, (b) PyrQ-CN in cyclohexane.

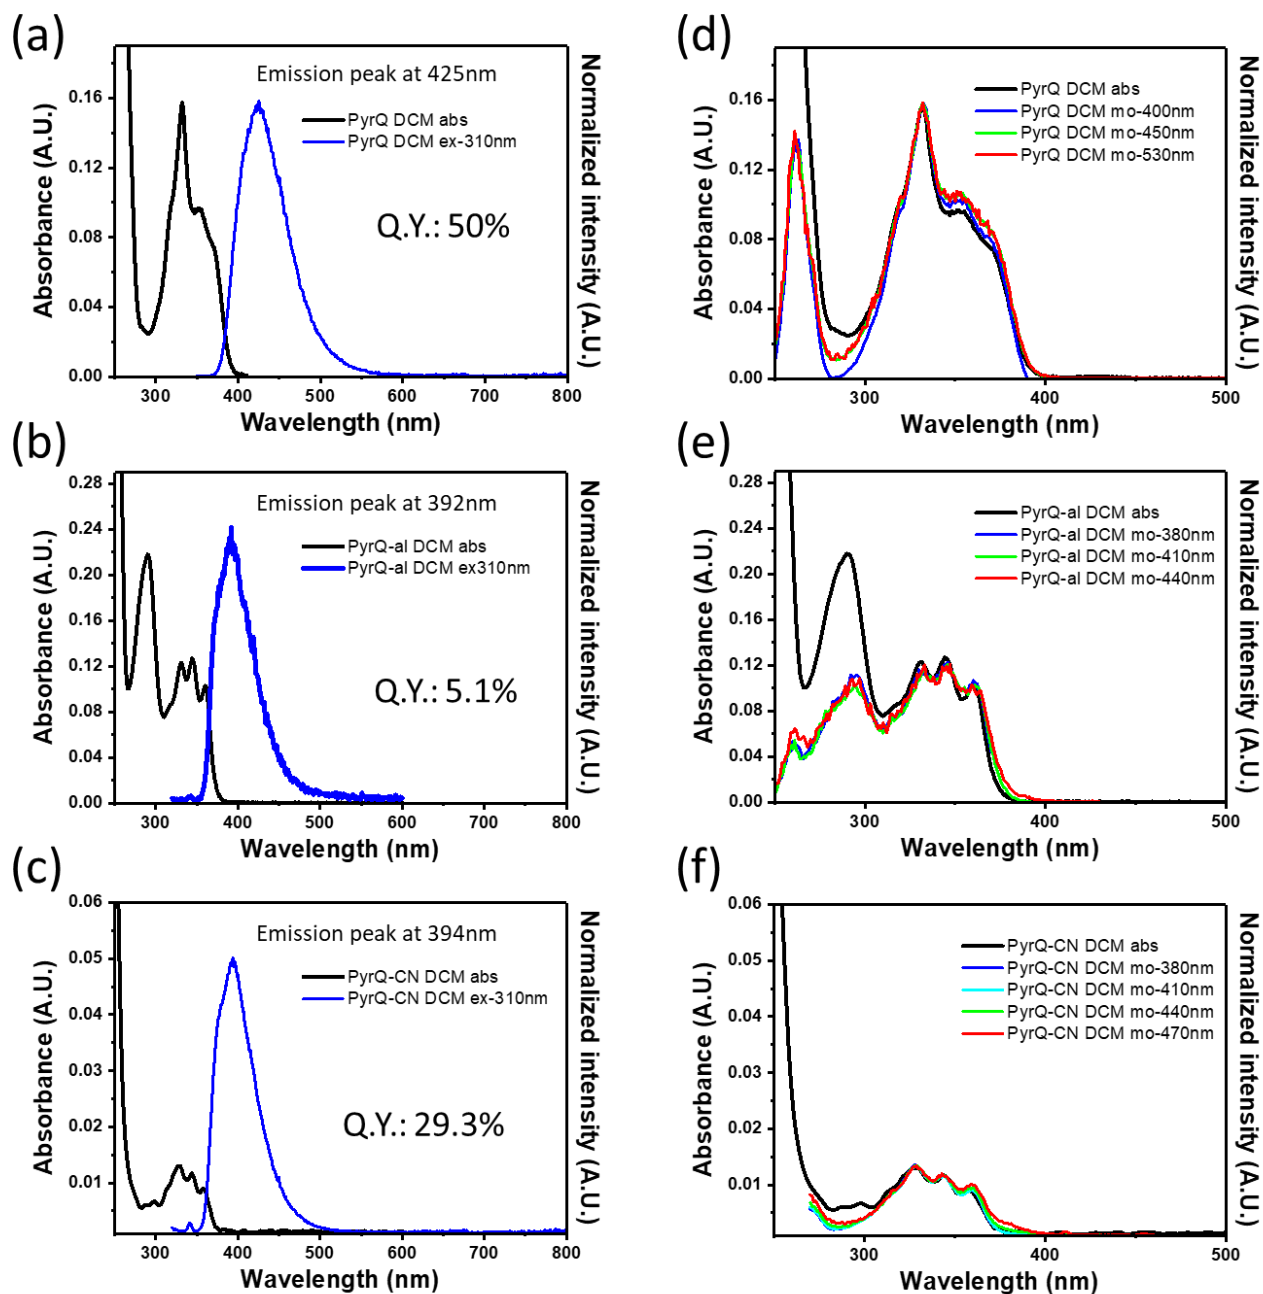

**Figure S25.** The emission spectrum of (a) **PyrQ**, (b) **PyrQ-al**, and (c) **PyrQ-CN** in dichloromethane, these spectra all reveal solely normal Stokes shifted emission. The excitation spectrum of (d) **PyrQ**, (e) **PyrQ-al**, and (f) **PyrQ-CN** are also measured, and these are similar to their absorption spectrum. It implies that these emissions originate from themselves. (**PyrQ-CN** is difficult to dissolve in dichloromethane.)

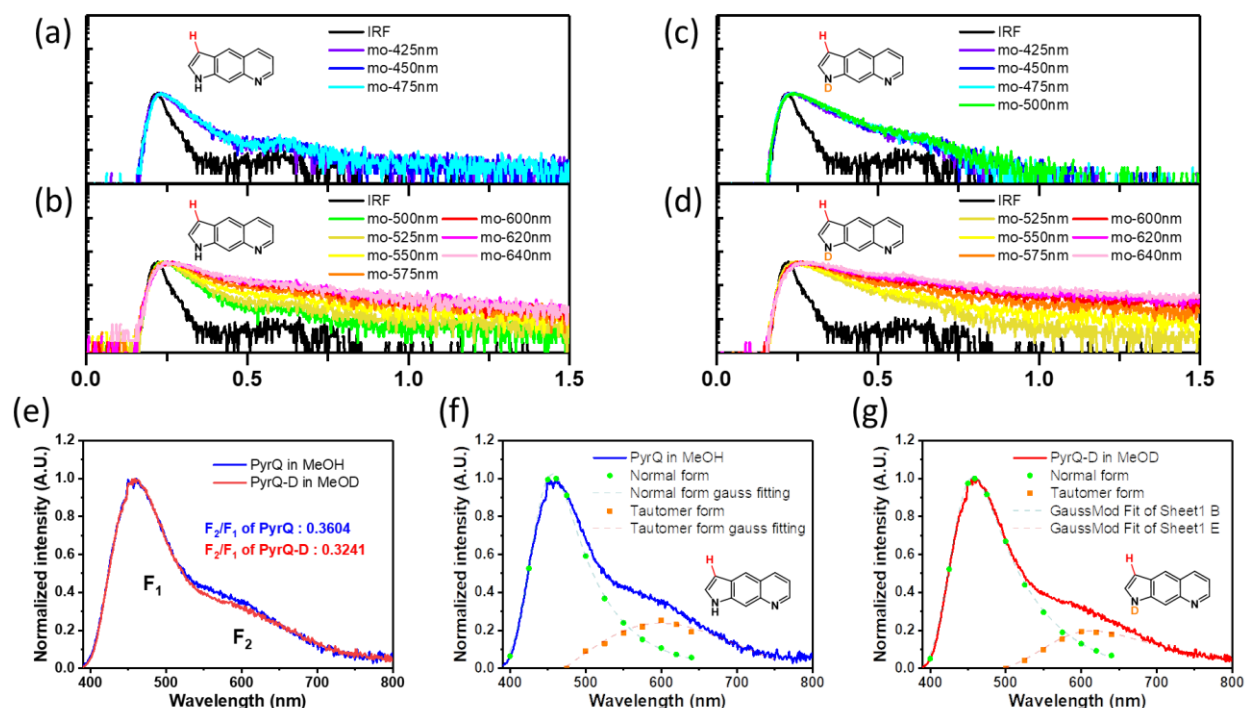

**Figure S26** PyrQ in MeOH, (a) monitored at  $\leq 475$  nm, has one decay kinetics, (b) when it is  $> 475$  nm, has two decay kinetics. This is due to the tautomer contribution being at  $> 475$  nm. In comparison, the proton transfer rate of **PyrQ-D** in MeOD is slower, so its fluorescence intensity will be weaker, (c)  $\leq 500$  nm, has one decay kinetics, (d) when it  $> 500$  nm, has two decay kinetics. (e) Normalized fluorescence intensity of **PyrQ** and **PyrQ-D** in MeOH and MeOD, and the  $F_2(461\text{nm})/F_1(600\text{nm})$  ratio are 0.3604 and 0.3241 for **PyrQ** (in MeOH) and **PyrQ-D** (in MeOD), respectively. Besides, calculate integral values for kinetic decay curve of two species (normal form and tautomeric form), and drawing the deconvolution plots of (f) **PyrQ** and (g) **PyrQ-D** are depicted (The green ball is  $F_1$  intensity, the orange square is  $F_2$  intensity, and all dash line is defined by the gauss fitting of their intensity point).

**Table S4.** The radiative and non-radiative rates ( $k_r$  and  $k_{nr}$ ) of **PyrQ** (in MeOH) and **PyrQ-D** (in MeOD) are roughly estimated by deconvolution.

| Compound      | Solvent            | Total PLQY <sup>a</sup> | intensity fraction of F <sub>1</sub> <sup>b</sup> | intensity fraction of F <sub>2</sub> <sup>b</sup> | F <sub>1</sub> PLQY <sup>c</sup> | F <sub>2</sub> PLQY <sup>c</sup> | $\tau_{\text{decay}}$ (s) <sup>d</sup> | $\tau_{\text{decay2}}$ (s) <sup>d</sup> | F <sub>2</sub> band $k_r$ <sup>e</sup> | F <sub>2</sub> band $k_{nr}$ <sup>e</sup> |
|---------------|--------------------|-------------------------|---------------------------------------------------|---------------------------------------------------|----------------------------------|----------------------------------|----------------------------------------|-----------------------------------------|----------------------------------------|-------------------------------------------|
| <b>PyrQ</b>   | CH <sub>3</sub> OH | 0.2%                    | 0.7904                                            | 0.2096                                            | 0.1581%                          | 0.0419%                          | $4.4 \times 10^{-11}$                  | $4.27 \times 10^{-10}$                  | $9.82 \times 10^5$                     | $2.34 \times 10^9$                        |
| <b>PyrQ-D</b> | CH <sub>3</sub> OD | 0.4%                    | 0.8449                                            | 0.1551                                            | 0.3380%                          | 0.0620%                          | $7.4 \times 10^{-11}$                  | $8.34 \times 10^{-10}$                  | $7.44 \times 10^5$                     | $1.20 \times 10^9$                        |

<sup>a</sup> The total PLQY refers to Table 1 in TEXT.

<sup>b</sup> This value is the integral of the emission intensity (F<sub>1</sub> or F<sub>2</sub>) divided by the integral of total emission intensity (F<sub>1</sub>+F<sub>2</sub>), which is estimated by deconvolution (Figs. S26f and S26g).

<sup>c</sup> The PLQY of F<sub>1</sub> and F<sub>2</sub>.

<sup>d</sup> The  $\tau_{\text{decay}}$  and  $\tau_{\text{decay2}}$  refer to Table 2 in TEXT.

<sup>e</sup> The  $k_r$  and  $k_{nr}$  of F<sub>2</sub> emission band are estimated by F<sub>2</sub> band PLQY and  $\tau_{\text{decay2}}$ .

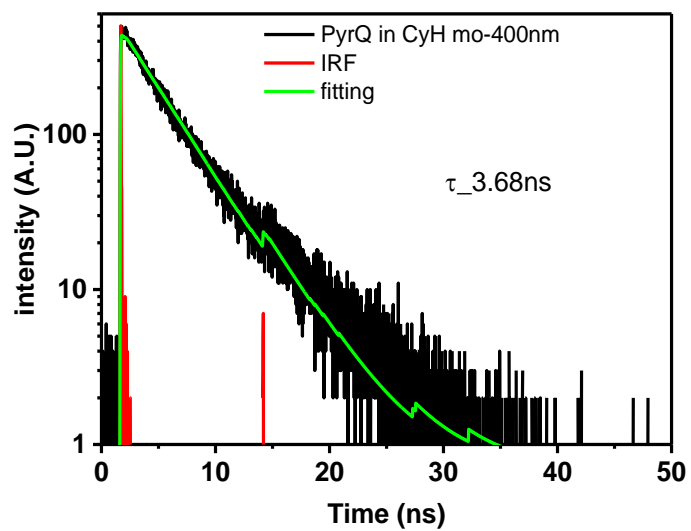

**Figure S27** PyrQ has only one dynamic decay lifetime of 3.68ns, measured by a TCSPC technique with a repetition rate of 8.2MHz Ti: Sapphire laser generated by an AOM system.

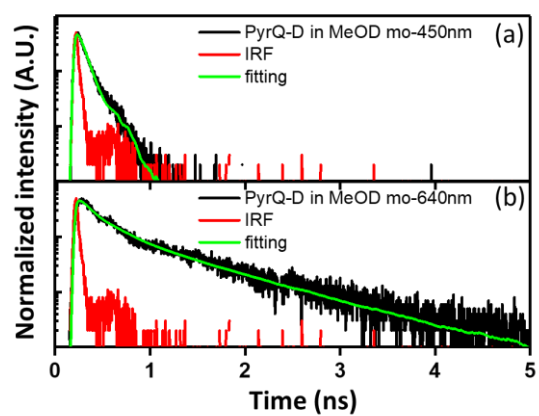

**Figure S28.** Time-resolved fluorescence of **PyrQ-D** in CH<sub>3</sub>OD monitored at (a) F<sub>1</sub> and (b) F<sub>2</sub> regions.

### 3. pH titration

#### Method and measurement:

The absorption and emission spectra were recorded by Hitachi U-3310 spectrophotometer and Edinburgh FS980 fluorometer at National Taiwan University. The titration experiments of all titled compounds were measured in water. pH meter is PH500 pH/mV/Temp Meter (Clean Corp.) with an electrode of Polilyte HT (Hamilton). Sodium hydroxide is First Grade (Shimakyu).

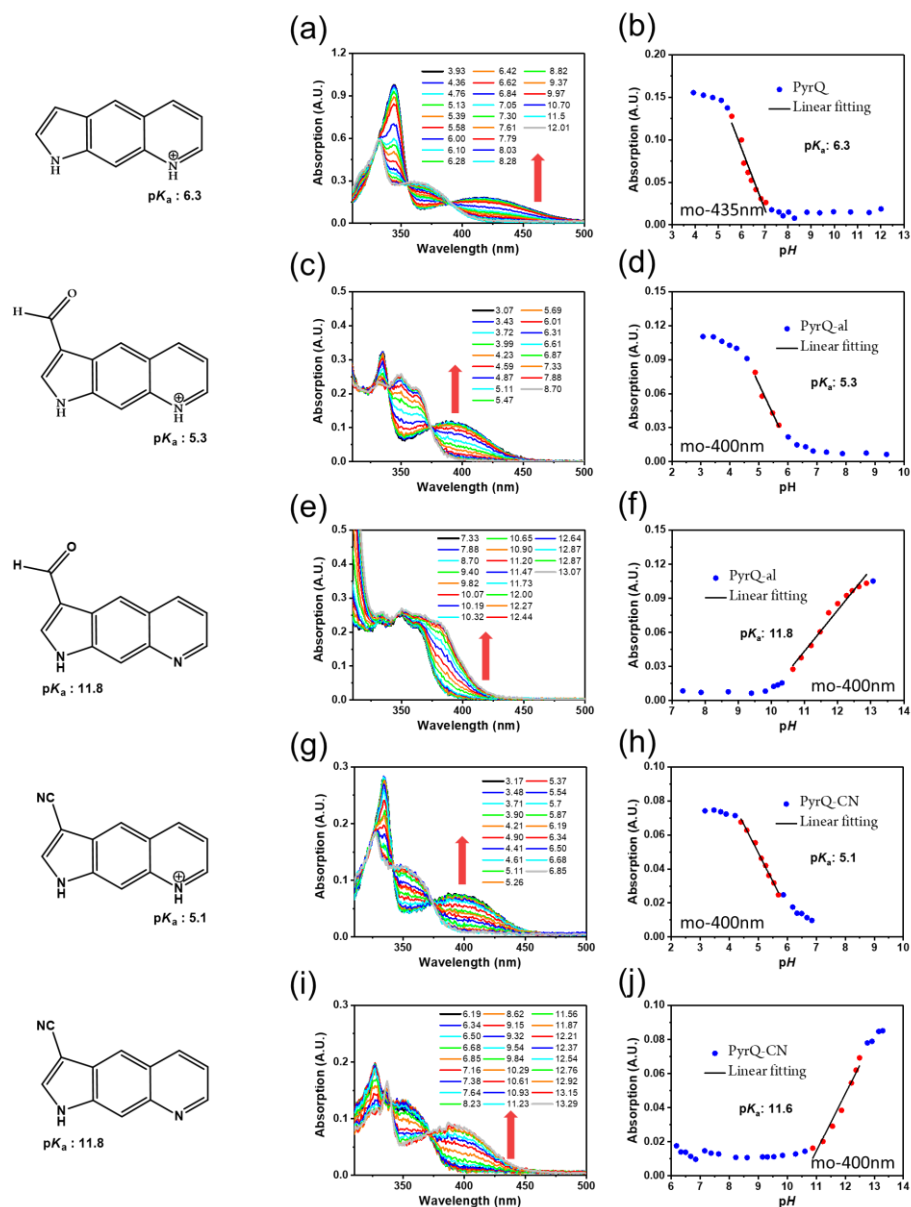

**Figure S29.** According to the absorption variation of (a) **PyrQ**, (c)(e) **PyrQ-al**, and (g)(i) **PyrQ-CN** in pH titration experiment, the  $pK_a$  of (b) **PyrQ**, (d)(f) **PyrQ-al**, and (h)(j) **PyrQ-CN** proton acceptor sites are calculated. All measurements are carried out in the water.

#### 4. Theoretical computation (1) – Gaussian program

**Table S5.** Calculated optical properties of **PyrQ**, **PyrQ-al**, and **PyrQ-CN** based on B3LYP/6–31+G(d,p) level in methanol.

| Name           | Normal form absorption <sup>a</sup> |        | Normal form emission <sup>b</sup> |        | Tautomer emission <sup>c</sup> |        |
|----------------|-------------------------------------|--------|-----------------------------------|--------|--------------------------------|--------|
|                | Absorption (nm)                     | f      | Emission (nm)                     | f      | Emission (nm)                  | f      |
| <b>PyrQ</b>    | 373.01                              | 0.0574 | 433.39                            | 0.1351 | 819.41                         | 0.0142 |
| <b>PyrQ-al</b> | 362.03                              | 0.1061 | 409.49                            | 0.1655 | 662.00                         | 0.0194 |
| <b>PyrQ-CN</b> | 355.59                              | 0.0815 | 406.52                            | 0.1561 | 672.80                         | 0.0190 |

<sup>a</sup> The structure was optimized in the ground state.

<sup>b</sup> The normal form structure was optimized in S<sub>1</sub> state.

<sup>c</sup> The tautomer structure was optimized in S<sub>1</sub> state.

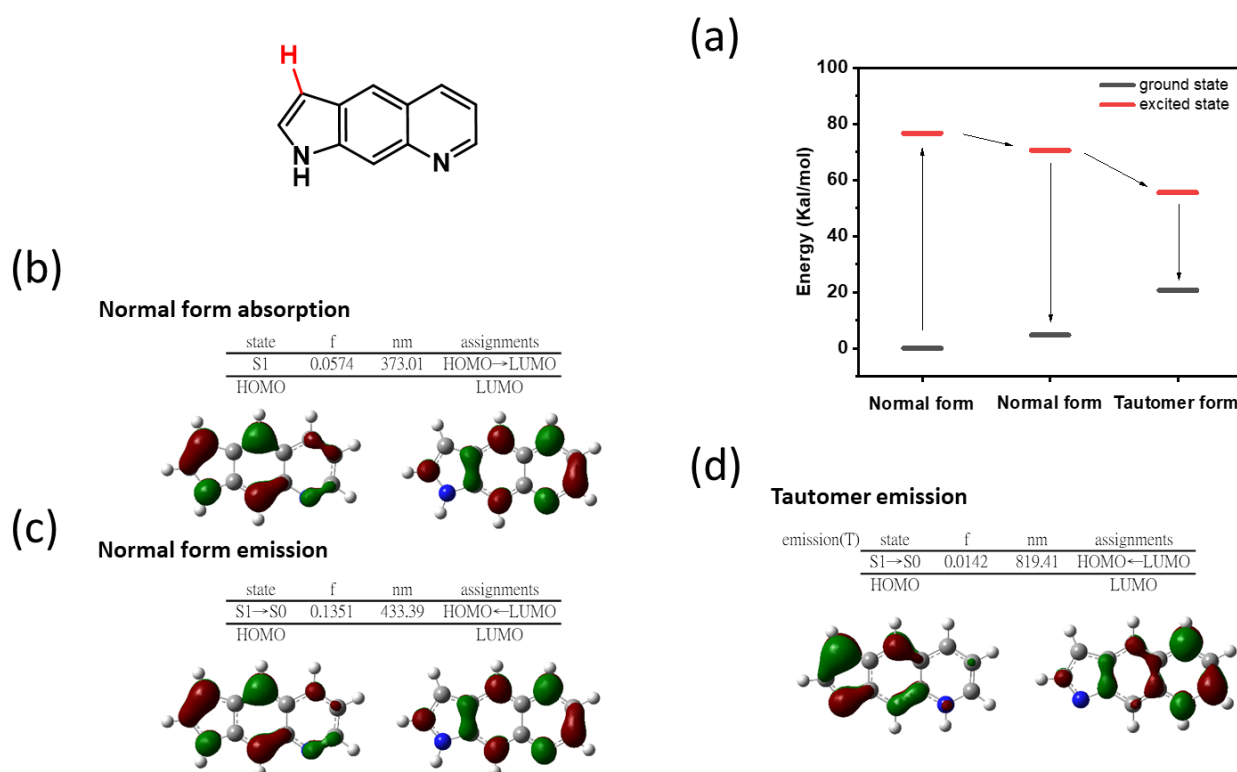

**Figure S30.** We performed thermodynamic calculations of SCPT based on B3LYP/6–31+G(d,p) level in methanol. (a) plot of SCPT process of **PyrQ**, the calculated result of **PyrQ** for (b) normal form absorption process, (c) normal form emission process, and (d) tautomer emission process. (The molecular orbital isovalue is set at 0.05.)

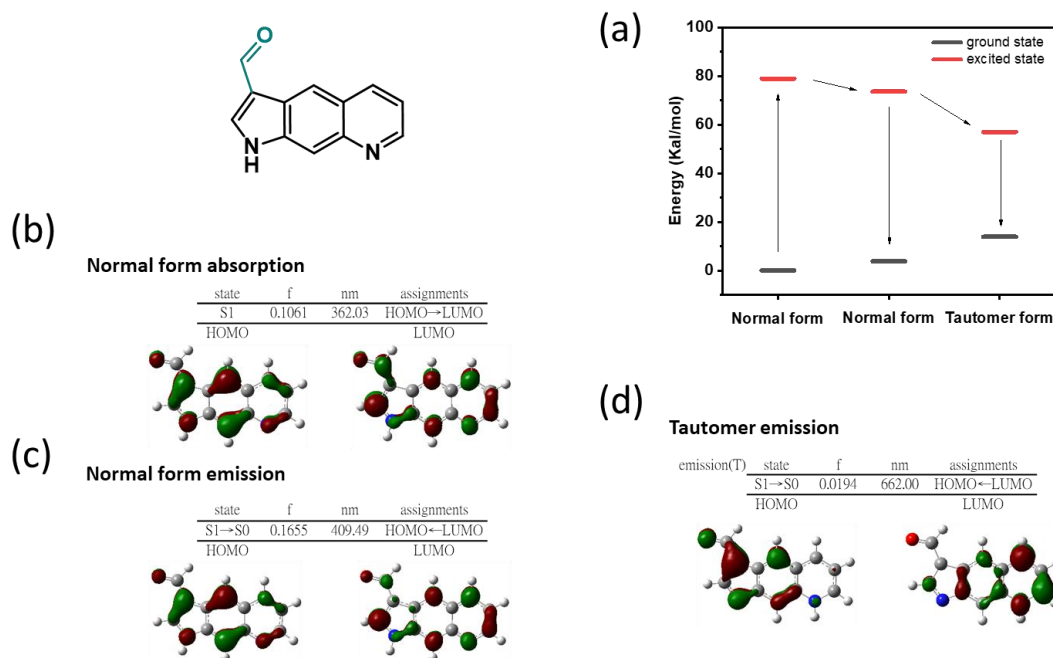

**Figure S31.** We performed thermodynamic calculations of SCPT based on B3LYP/6–31+G(d,p) level in methanol. (a) plot of SCPT process of **PyrQ-al**, the calculated result of **PyrQ-al** for (b) normal form absorption process, (c) normal form emission process, and (d) tautomer emission process. (The molecular orbital isovalue is set at 0.05.)

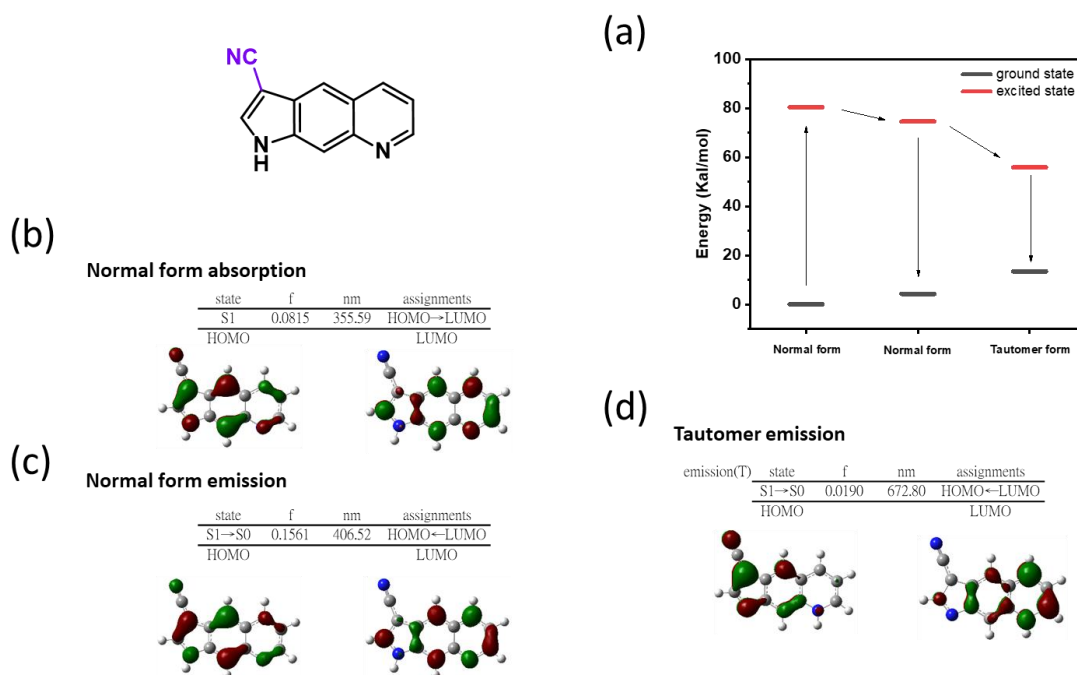

**Figure S32.** We performed thermodynamic calculations of SCPT based on B3LYP/6–31+G(d,p) level in methanol. (a) plot of SCPT process of **PyrQ-CN**, the calculated result of **PyrQ-CN** for (b) normal form absorption process, (c) normal form emission process, and (d) tautomer emission process. (The molecular orbital isovalue is set at 0.05.)

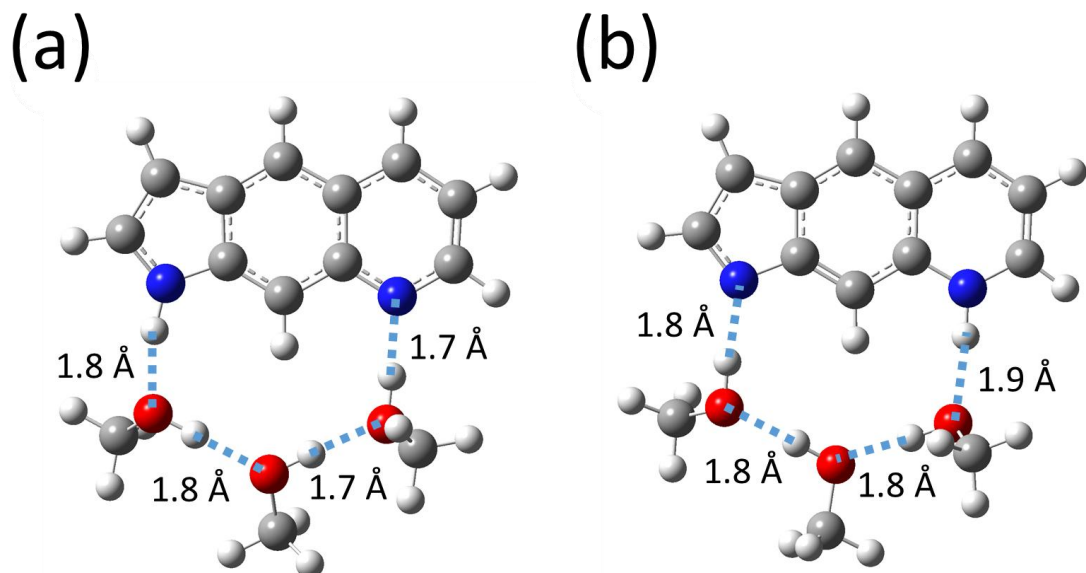

**Figure S33.** We performed optimization of **PyrQ** structure with two or three methanol molecules, which calculated based on B3LYP/6–31+G(d,p) level. (a) normal form in  $S_1$  state, and (b) tautomer form in  $S_1$  state.

**Table S6.** Calculated optical properties of **PyrQ**, **PyrQ-al**, and **PyrQ-CN** based on CAM-B3LYP/6–31+G(d,p) level in methanol.

| Name           | Normal form absorption <sup>a</sup> |        | Normal form emission <sup>b</sup> |        | Tautomer emission <sup>c</sup> |        |
|----------------|-------------------------------------|--------|-----------------------------------|--------|--------------------------------|--------|
|                | Absorption (nm)                     | f      | Emission (nm)                     | f      | Emission (nm)                  | f      |
| <b>PyrQ</b>    | 328.32                              | 0.0913 | 392.09                            | 0.2211 | 622.23                         | 0.0350 |
| <b>PyrQ-al</b> | 319.67                              | 0.1627 | 372.95                            | 0.2432 | 525.41                         | 0.0538 |
| <b>PyrQ-CN</b> | 315.52                              | 0.1319 | 371.57                            | 0.2412 | 527.84                         | 0.0535 |

<sup>a</sup> The structure was optimized in the ground state.

<sup>b</sup> The normal form structure was optimized in  $S_1$  state.

<sup>c</sup> The tautomer structure was optimized in  $S_1$  state.

**Table S7.** Calculated optical properties of **PyrQ**, **PyrQ-al**, and **PyrQ-CN** based on B3LYP/6–31+G(d,p) level in cyclohexane.

| Name           | Normal form absorption <sup>a</sup> |        | Normal form emission <sup>b</sup> |        |
|----------------|-------------------------------------|--------|-----------------------------------|--------|
|                | Absorption (nm)                     | f      | Emission (nm)                     | f      |
| <b>PyrQ</b>    | 366.76                              | 0.0673 | 414.11                            | 0.0847 |
| <b>PyrQ-al</b> | 360.53                              | 0.1066 | 398.37                            | 0.0990 |
| <b>PyrQ-CN</b> | 354.36                              | 0.0911 | 395.05                            | 0.0974 |

<sup>a</sup> The structure was optimized in the ground state.

<sup>b</sup> The normal form structure was optimized in  $S_1$  state.

<sup>c</sup> The tautomer structure was optimized in  $S_1$  state.

**Table S8.** Calculated optical properties of **PyrQ**, **PyrQ-al**, and **PyrQ-CN** based on CAM-B3LYP /6–31+G(d,p) level in cyclohexane.

| Name           | Normal form absorption <sup>a</sup> |        | Normal form emission <sup>b</sup> |        |
|----------------|-------------------------------------|--------|-----------------------------------|--------|
|                | Absorption (nm)                     | f      | Emission (nm)                     | f      |
| <b>PyrQ</b>    | 324.62                              | 0.1043 | 372.78                            | 0.1413 |
| <b>PyrQ-al</b> | 318.93                              | 0.1634 | 360.33                            | 0.1533 |
| <b>PyrQ-CN</b> | 314.63                              | 0.1444 | 357.94                            | 0.1549 |

<sup>a</sup> The structure was optimized in the ground state.

<sup>b</sup> The normal form structure was optimized in S<sub>1</sub> state.

<sup>c</sup> The tautomer structure was optimized in S<sub>1</sub> state.

## 5. Theoretical computation (2) – MD

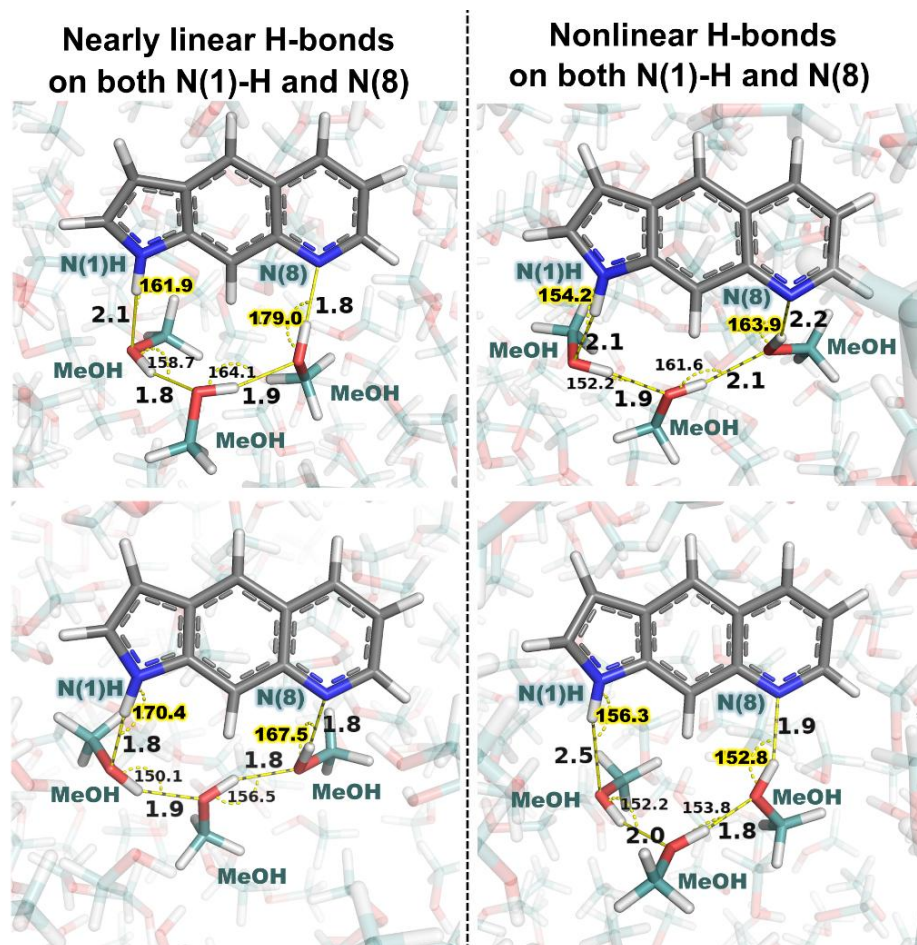

**Figure S34.** The MD snapshot of **PyrQ:(MeOH)<sub>3</sub>** complex are shown the geometry requires, which are more nearly linear hydrogen bonds or nonlinear hydrogen bonds on both N(1)-H and N(8) sites.

**Table S9.** Simulation obtained the existence time of bulk state and relay state ( $\tau_1$  and  $\tau_{-1}$ ). This table only considers  $n= 3\sim 5$  for **PyrQs:(MeOH)<sub>n</sub>**. The durations of the bulk state and relay state were measured 10 times within a timeframe of 1 ns using MD trajectory data.

| Compound | Relay state time (fs) | Bulk state time (fs) | $K_{eq}$ |
|----------|-----------------------|----------------------|----------|
| PyrQ     | 23139                 | 976861               | 0.023687 |
|          | 31543                 | 968457               | 0.03257  |
|          | 17469                 | 982531               | 0.01778  |
|          | 7141                  | 992859               | 0.007192 |
|          | 30266                 | 969734               | 0.031211 |
|          | 38110                 | 961890               | 0.03962  |
|          | 23826                 | 976174               | 0.024408 |
|          | 43048                 | 956952               | 0.044984 |
|          | 41389                 | 958611               | 0.043176 |
|          | 10902                 | 989098               | 0.011022 |
| PyrQ-D   | 8961                  | 991039               | 0.009042 |
|          | 24827                 | 975173               | 0.025459 |
|          | 54386                 | 945614               | 0.057514 |
|          | 63360                 | 936640               | 0.067646 |
|          | 1135                  | 998865               | 0.001136 |
|          | 31849                 | 968151               | 0.032897 |
|          | 48015                 | 951985               | 0.050437 |
|          | 23783                 | 976217               | 0.024362 |
|          | 16495                 | 983505               | 0.016772 |
|          | 13085                 | 986915               | 0.013258 |
| PyrQ-al  | 25451                 | 974549               | 0.026116 |
|          | 15407                 | 984593               | 0.015648 |
|          | 867                   | 999133               | 0.000868 |
|          | 6247                  | 993753               | 0.006286 |
|          | 48541                 | 951459               | 0.051017 |
|          | 23195                 | 976805               | 0.023746 |
|          | 17912                 | 982088               | 0.018239 |
|          | 25179                 | 974821               | 0.025829 |
|          | 43970                 | 956030               | 0.045992 |
|          | 8502                  | 991498               | 0.008575 |
| PyrQ-CN  | 37219                 | 962781               | 0.038658 |
|          | 2302                  | 997698               | 0.002307 |
|          | 27586                 | 972414               | 0.028369 |
|          | 12125                 | 987875               | 0.012274 |
|          | 28948                 | 971052               | 0.029811 |
|          | 10646                 | 989354               | 0.010761 |
|          | 5819                  | 994181               | 0.005853 |
|          | 18271                 | 981729               | 0.018611 |
|          | 11102                 | 988898               | 0.011227 |
|          | 15179                 | 984821               | 0.015413 |

**Table S10.** The  $k_{PT}$  was calculated by experimental  $k_{SCPT}$  and computational  $K_{eq}$ .

| Compound       | Solvent            | $\tau_{decay}$ (ps) <sup>a</sup> | $k_{SCPT}(s^{-1})$ <sup>b</sup> | $K_{eq}$ <sup>c</sup> | $k_{PT}(s^{-1})$ <sup>d</sup> |
|----------------|--------------------|----------------------------------|---------------------------------|-----------------------|-------------------------------|
| <b>PyrQ</b>    | CH <sub>3</sub> OH | 44                               | $2.27 \times 10^{10}$           | 2.8%                  | $8.11 \times 10^{11}$         |
| <b>PyrQ-D</b>  | CH <sub>3</sub> OD | 74                               | $1.35 \times 10^{10}$           | 2.9%                  | $4.66 \times 10^{11}$         |
| <b>PyrQ-al</b> | CH <sub>3</sub> OH | 100                              | $1.00 \times 10^{10}$           | 2.2%                  | $4.55 \times 10^{11}$         |
| <b>PyrQ-CN</b> | CH <sub>3</sub> OH | 155                              | $0.65 \times 10^{10}$           | 1.7%                  | $3.82 \times 10^{11}$         |

<sup>a</sup> The fluorescence decay lifetime of normal form measured by time-resolved fluorescence spectroscopy.

<sup>b</sup>  $k_{SCPT}$  is  $1/\tau_{decay}$ .

<sup>c</sup> Equilibrium constant (average) of bulk state and relay state in the methanol, which calculated by MD (see Table S9).

<sup>d</sup> Rate constant of proton transfer, which was calculated by eq. 1 in the TEXT.

## 6. Reference

- S1. S. M. Westaway, Y. K. Chung, J. B. Davis, V. Holland, J. C. Jerman, S. J. Medhurst, H. K. Rami, G. Stemp, A. J. Stevens, M. Thompson, K. Y. Winbornb, J. Wright, *Bioorg. Med. Chem. Lett.*, 2006, **16**, 4533–4536.
- S2. v. Braun, *Chem. Ber.*, 1913, **46**, 3182.
